# Supplementary material for: Analyses of Transcriptomics Cell Signalling for Pre-Screening Applications in the Integrated Approach for Testing and Assessment of Non-Genotoxic Carcinogens
Source: Int J Mol Sci. 2022 Oct 22;23(21):12718. doi: 10.3390/ijms232112718 (PMC9659232; doi:10.3390/ijms232112718)
Supplement: Supplementary file 1 [file ijms-23-12718-s001.zip]

Archive with 5 entries (5 files):
- Supplementary_Figures_S1_S7 rev.pdf
- Table S1rev.xlsx
- Table S2rev.xlsx
- Table S3 rev.xlsx
- Table S4 rev.xlsx
