# Supplementary material for: Analyses of Transcriptomics Cell Signalling for Pre-Screening Applications in the Integrated Approach for Testing and Assessment of Non-Genotoxic Carcinogens
Source: Int J Mol Sci. 2022 Oct 22;23(21):12718. doi: 10.3390/ijms232112718 (PMC9659232; doi:10.3390/ijms232112718)
Supplement: Supplementary file 1 [file ijms-23-12718-s001.zip › Supplementary_Figures_S1_S7 rev.pdf]

Figure S1

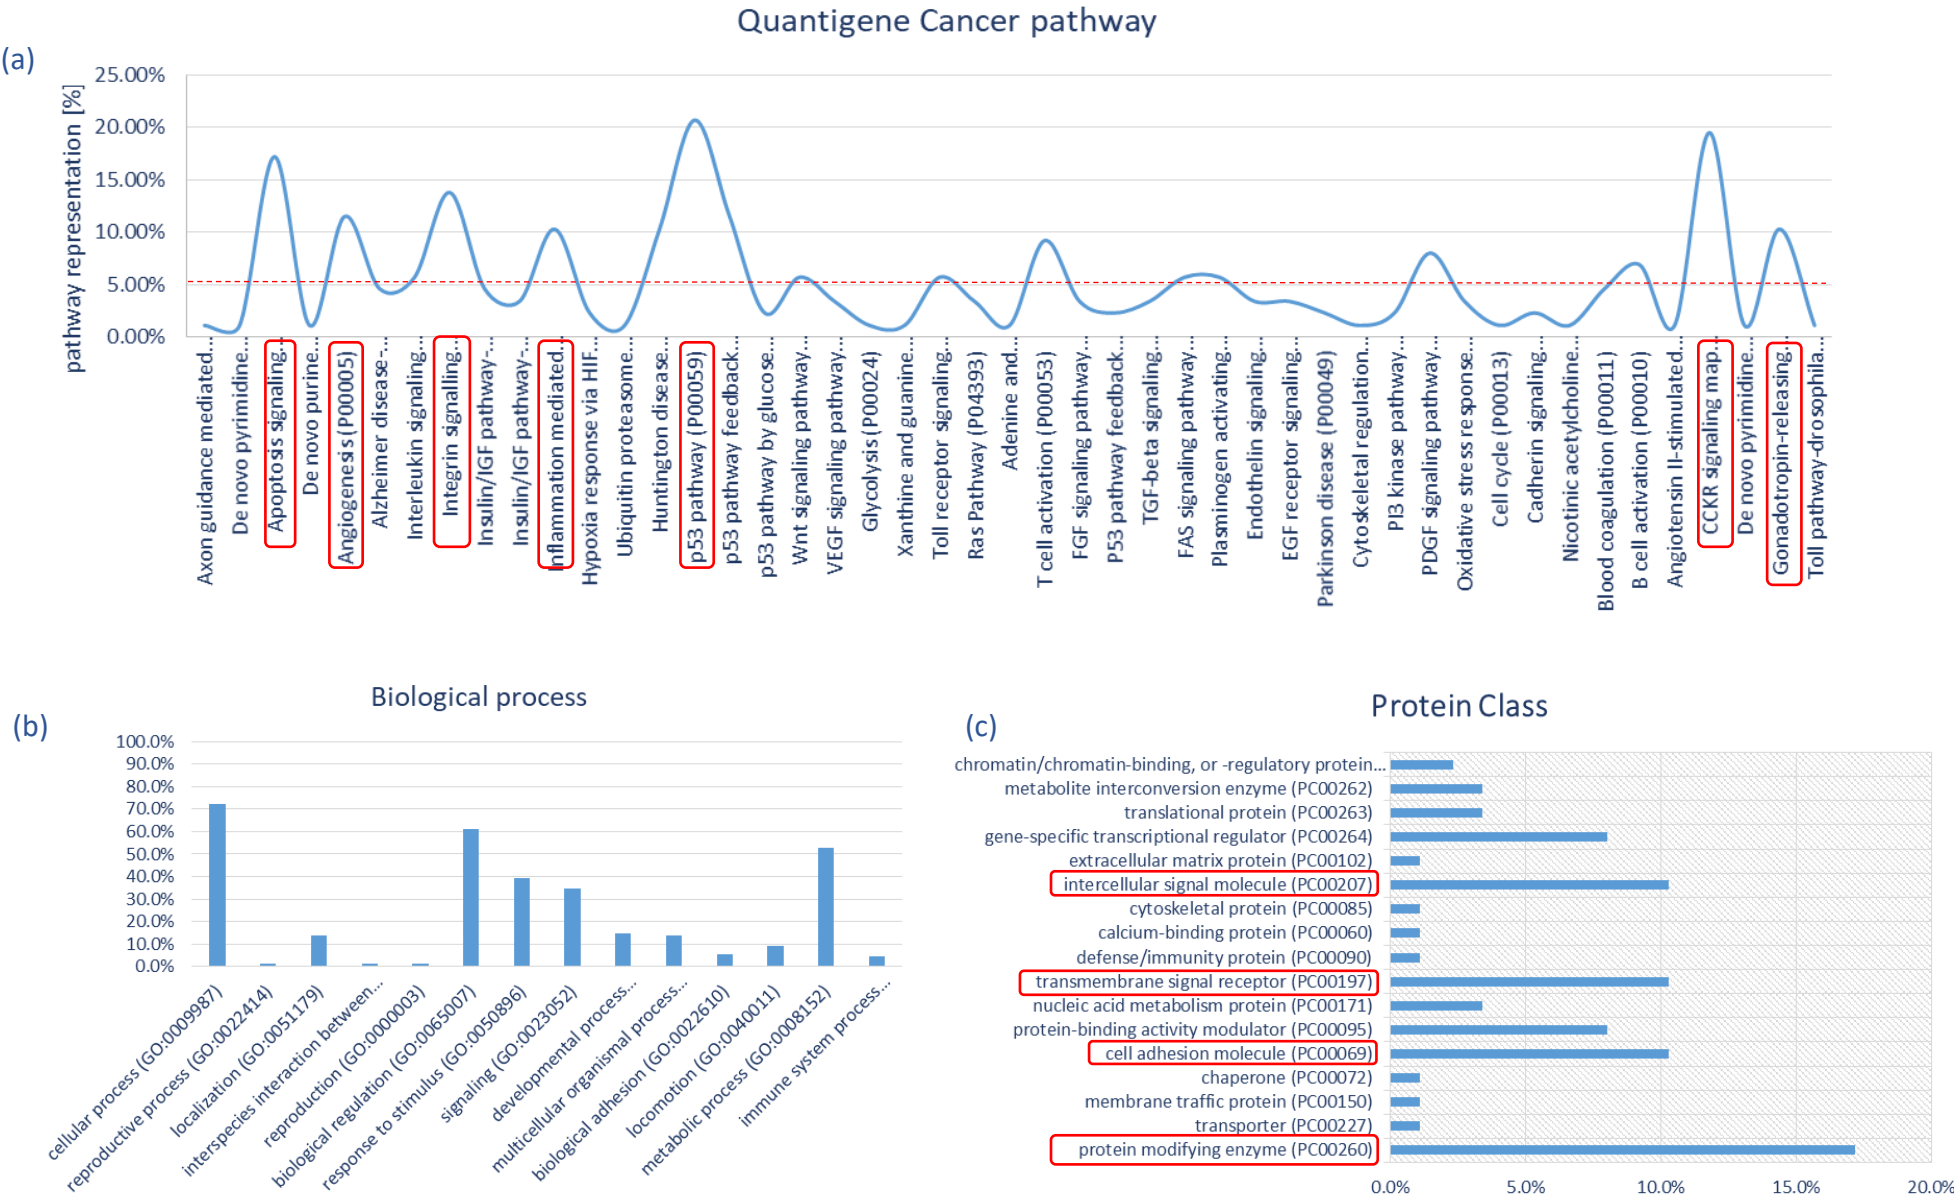

Figure S2

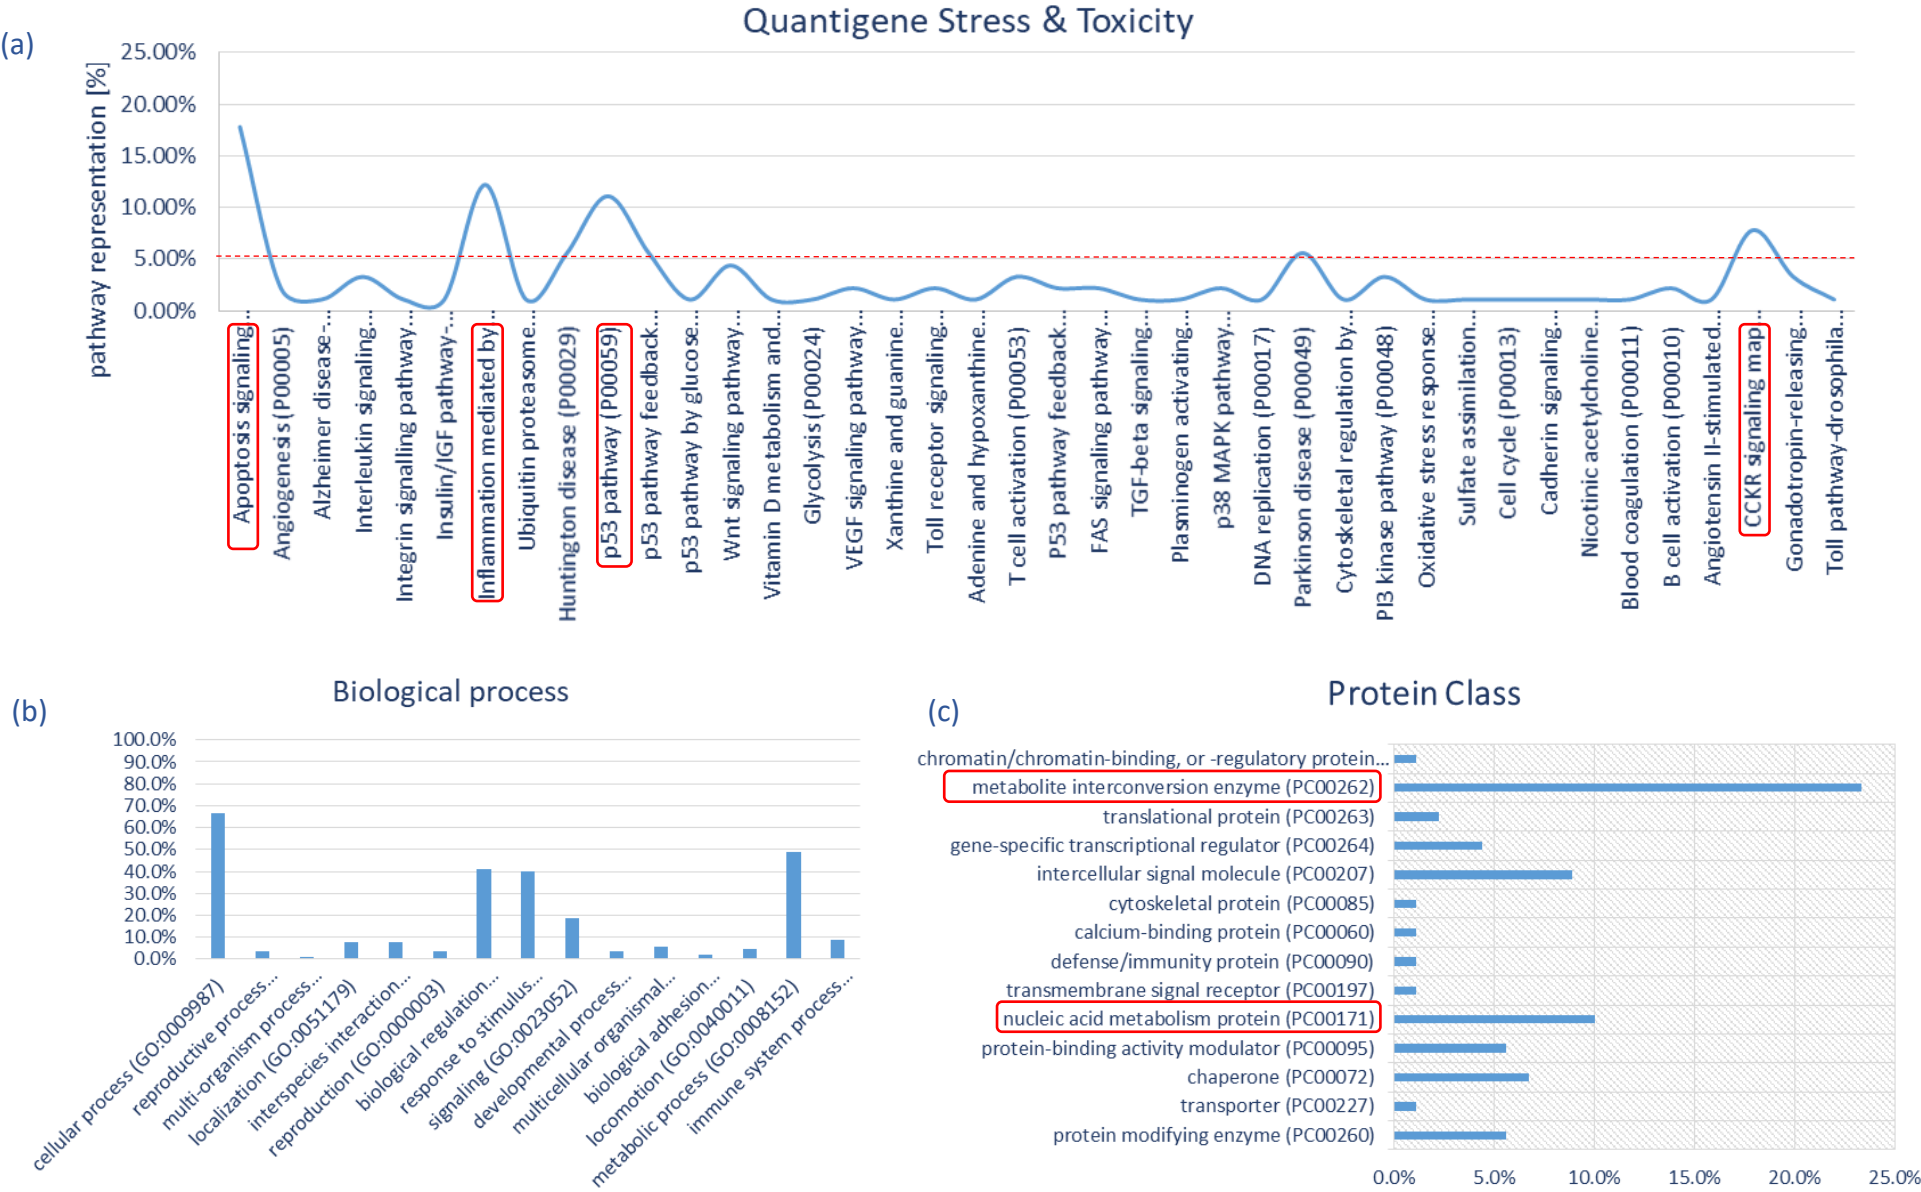

Figure S3

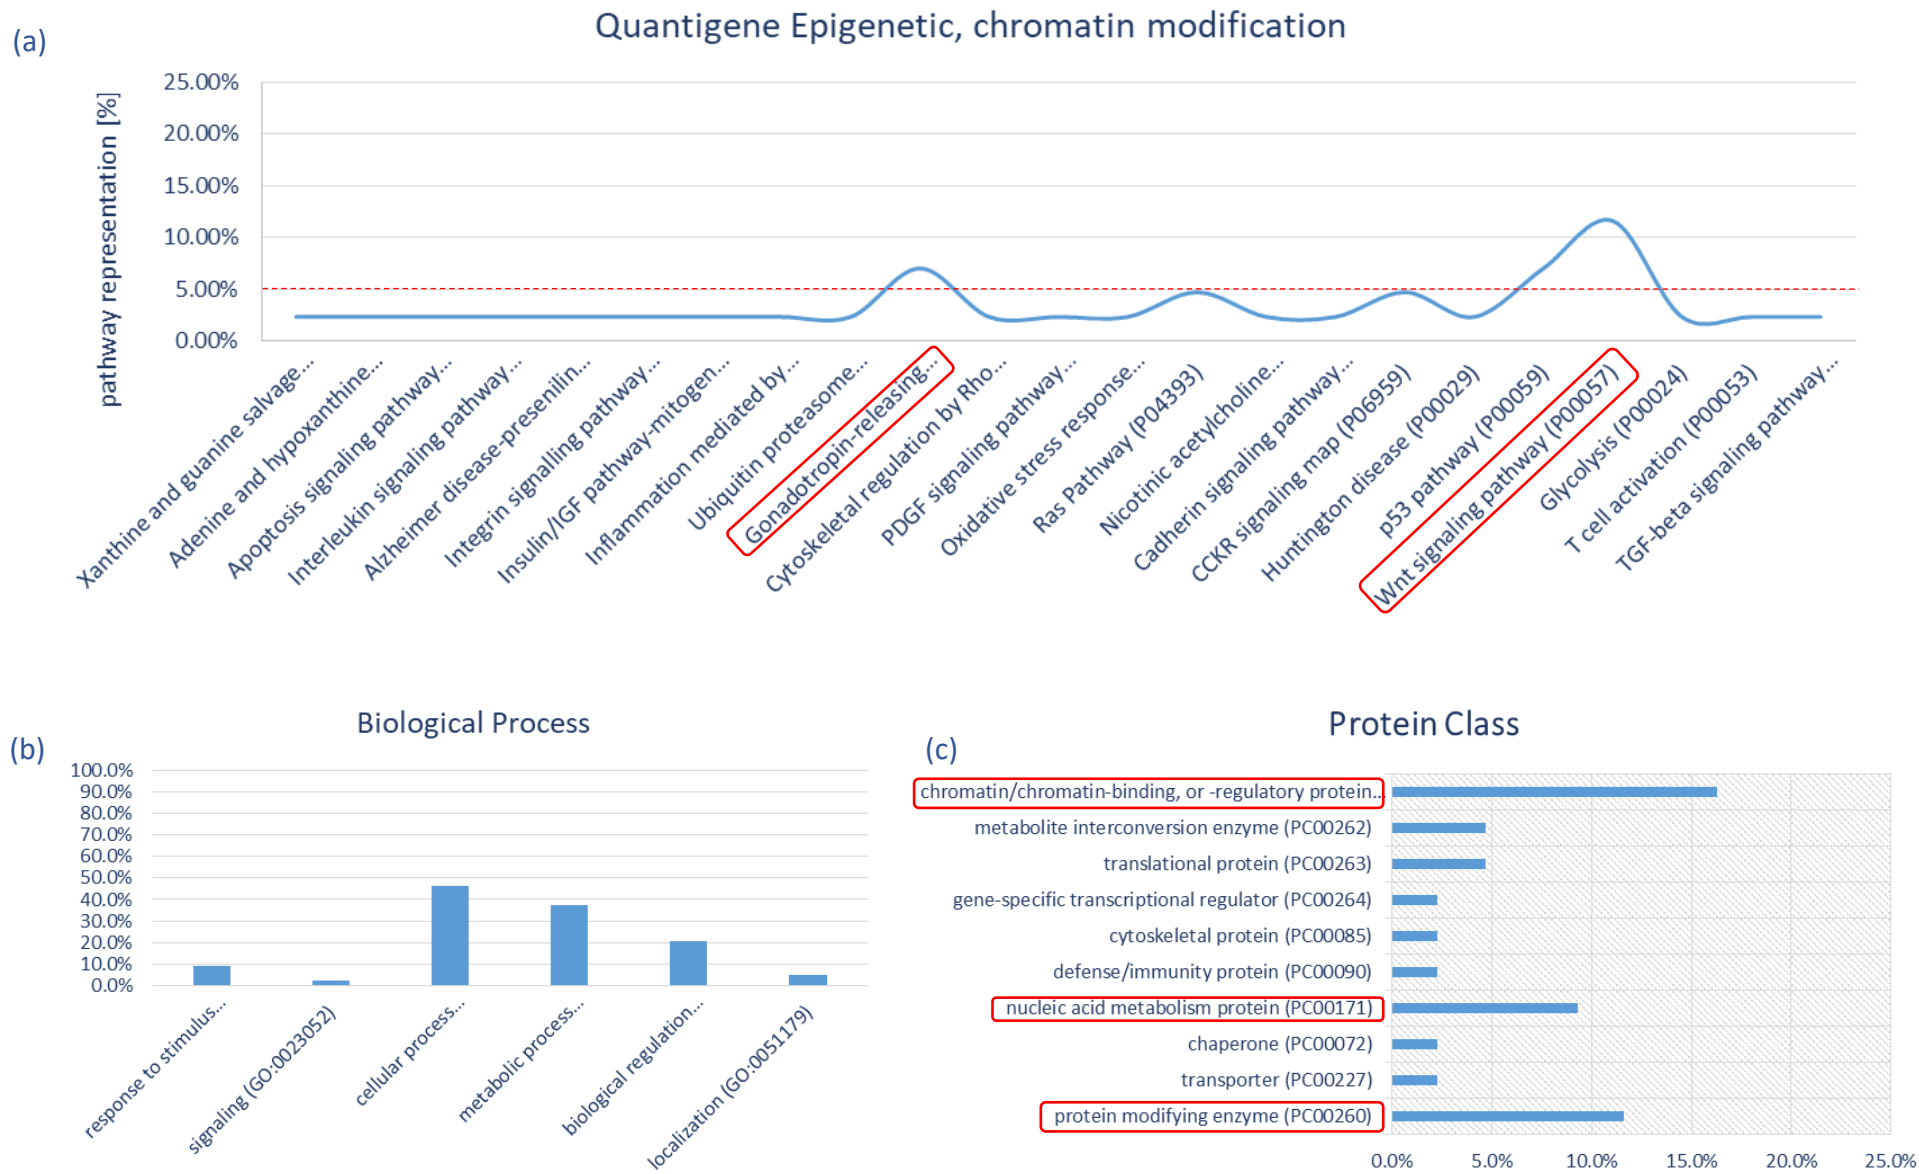

Figure S4

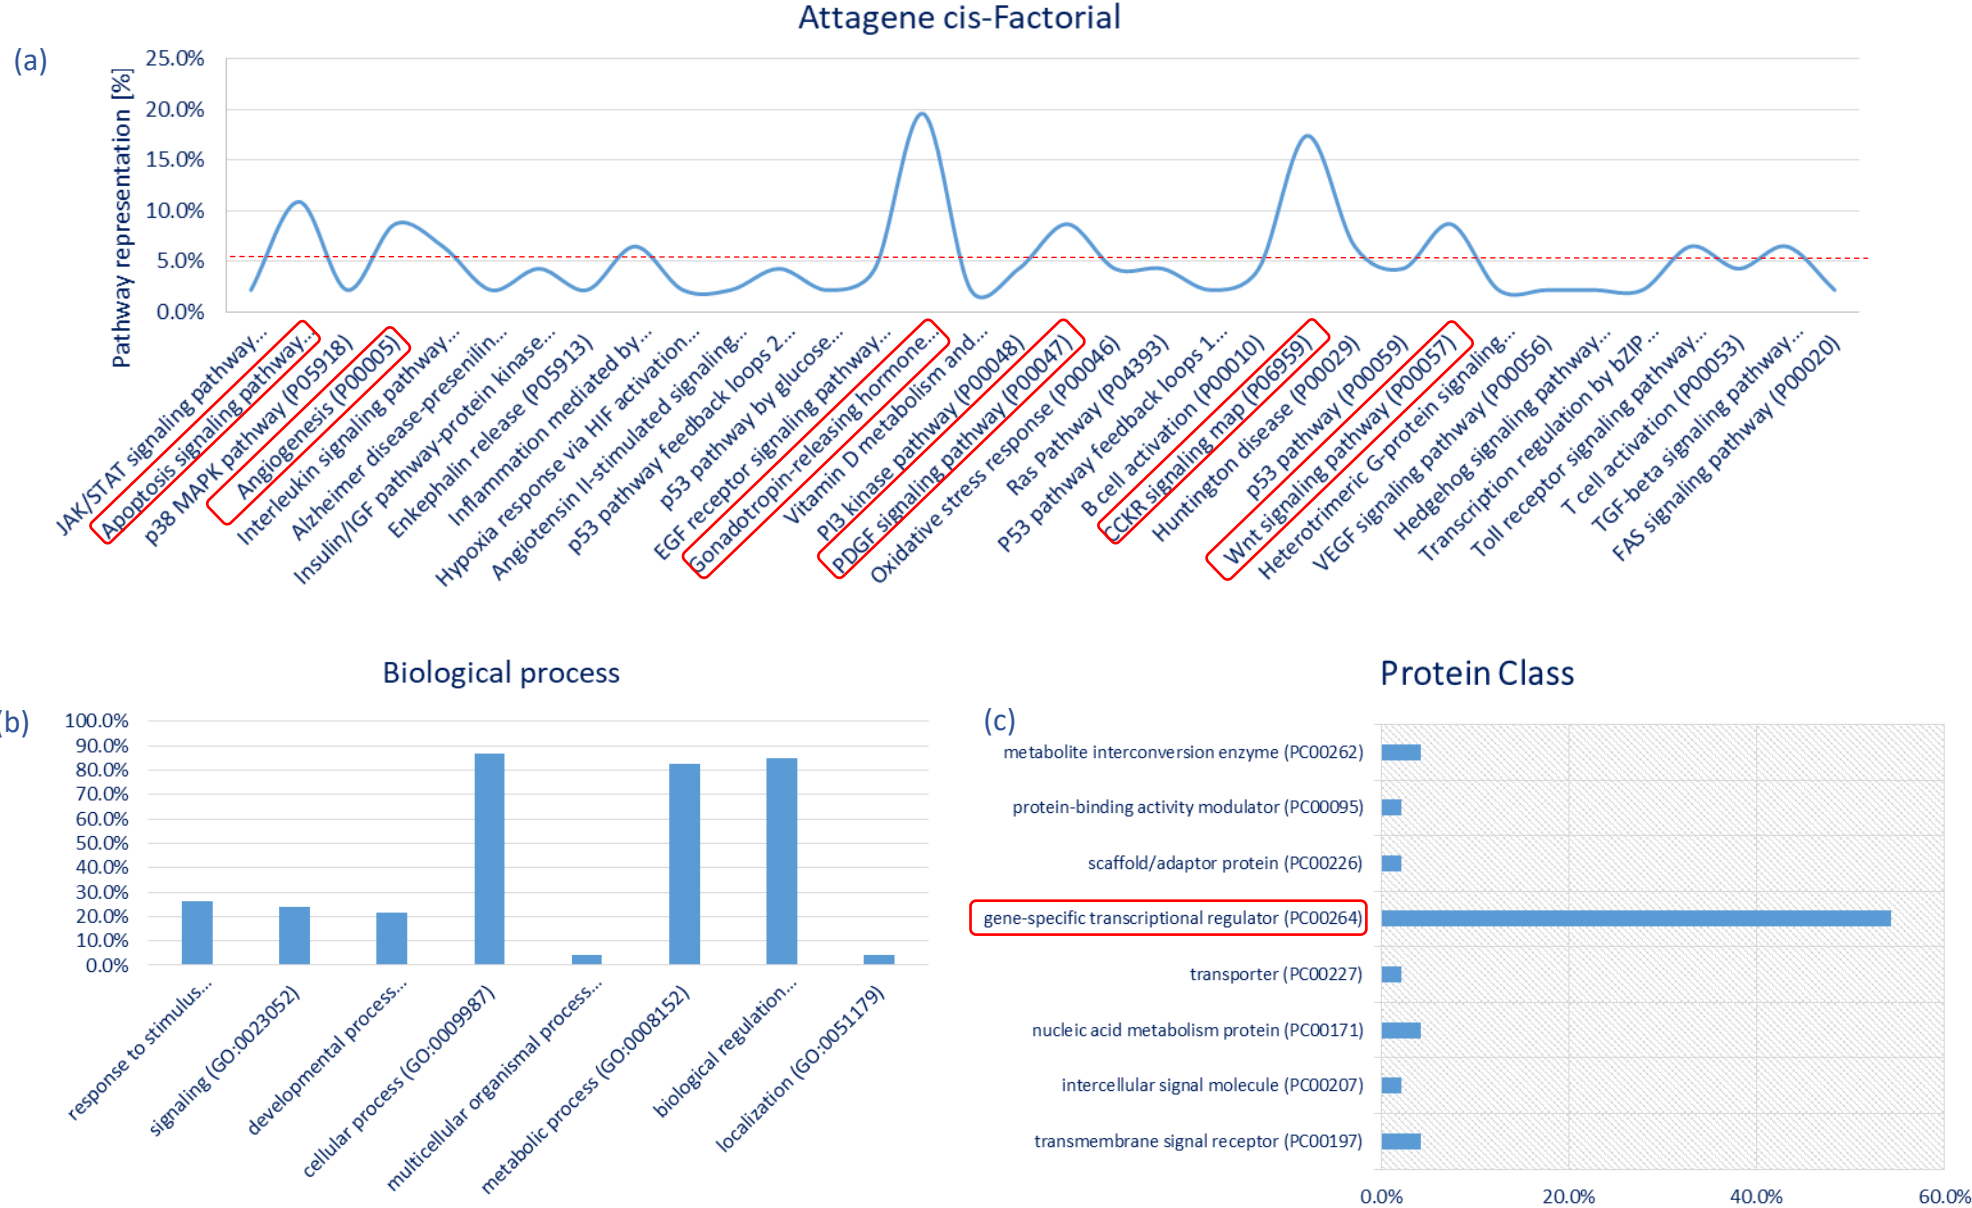

Figure S5

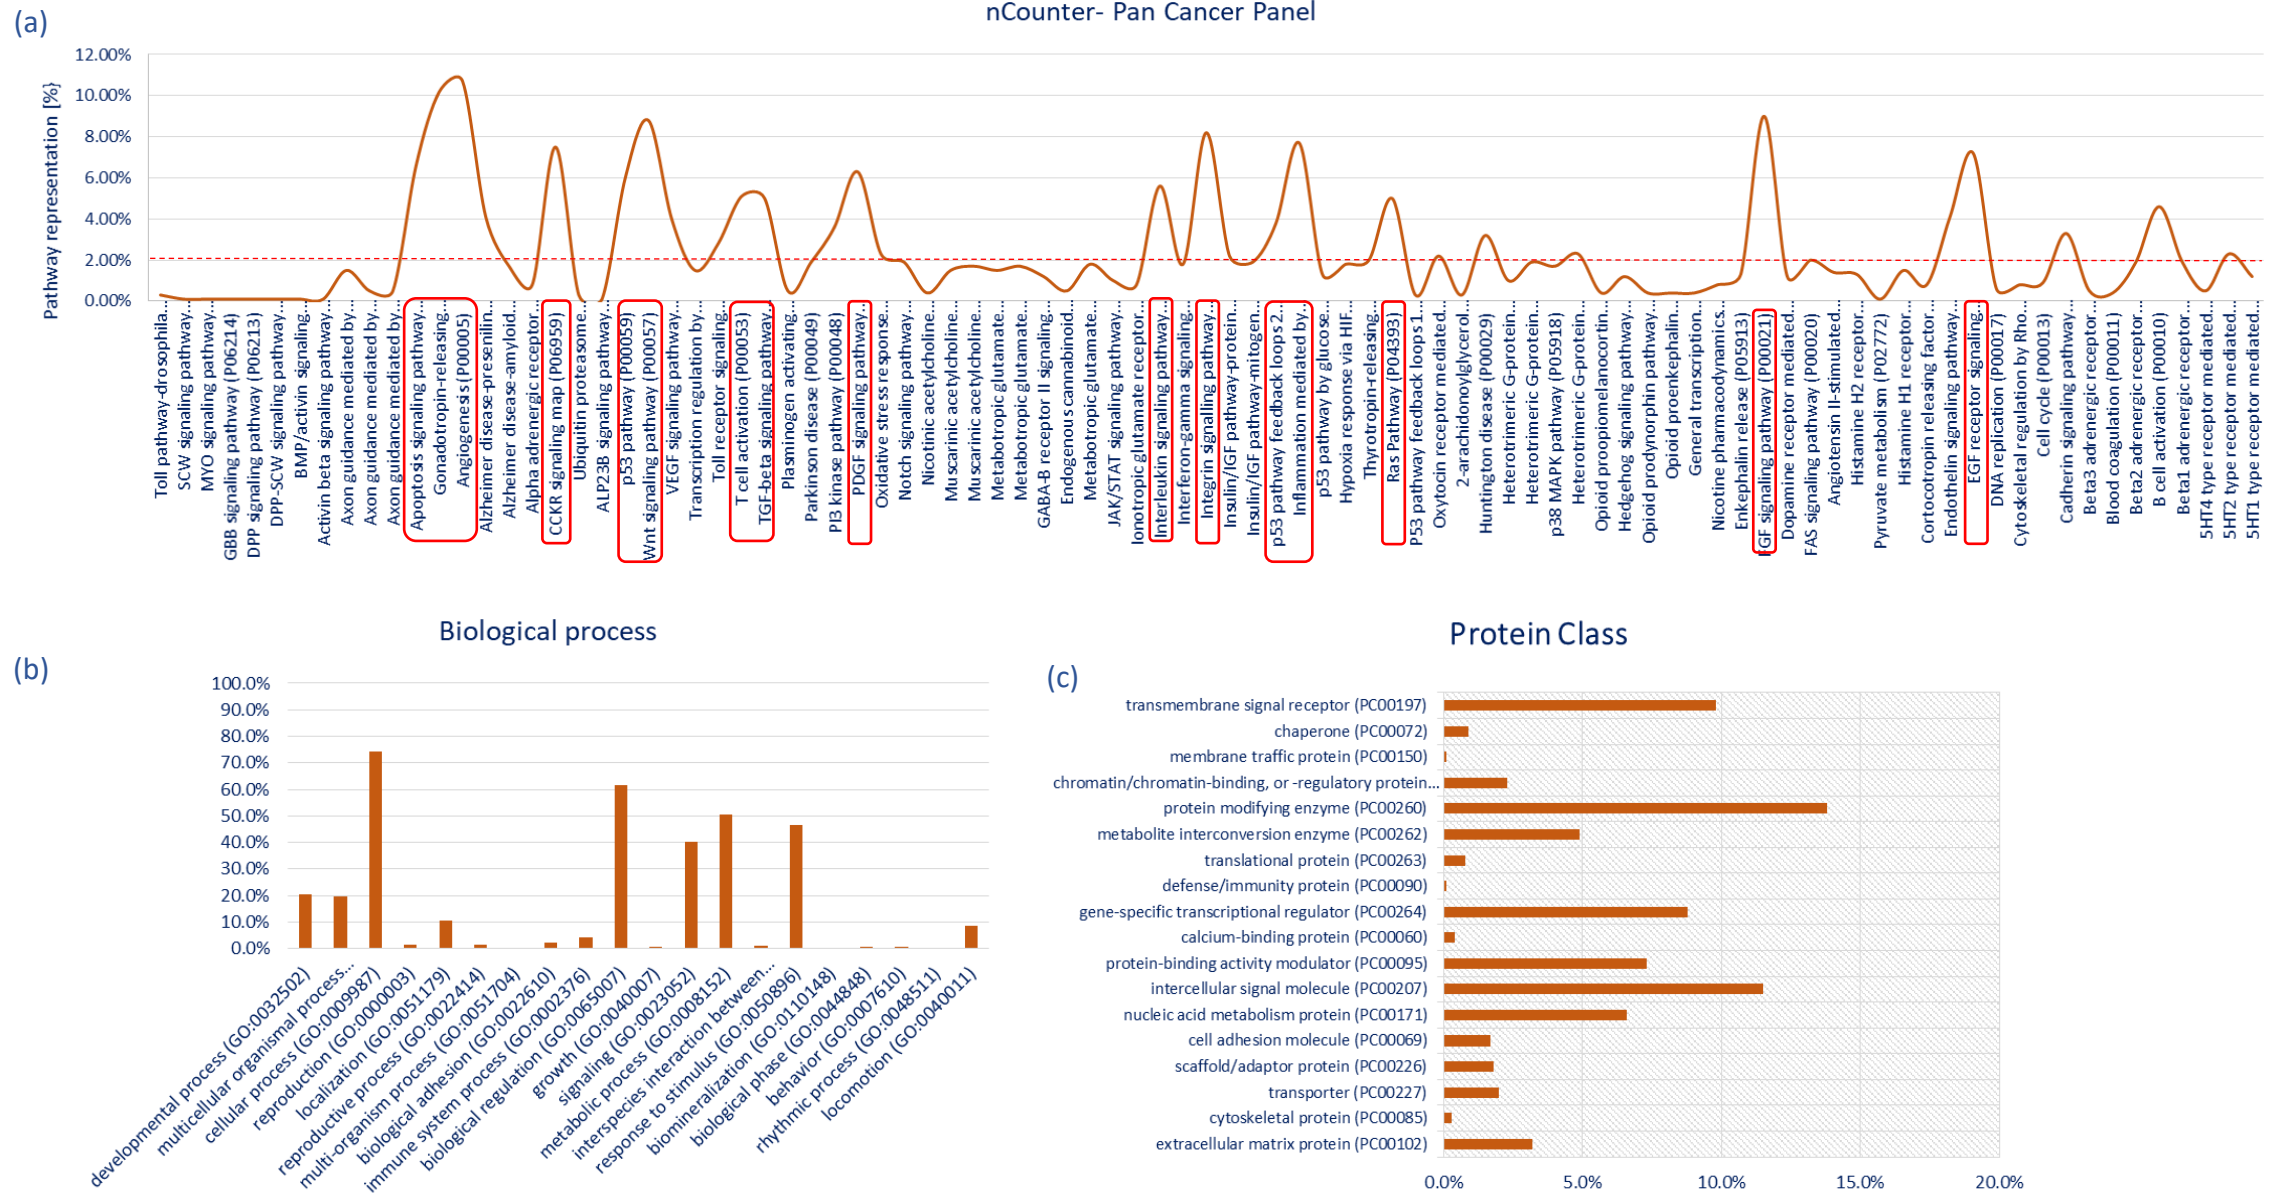

Figure S6

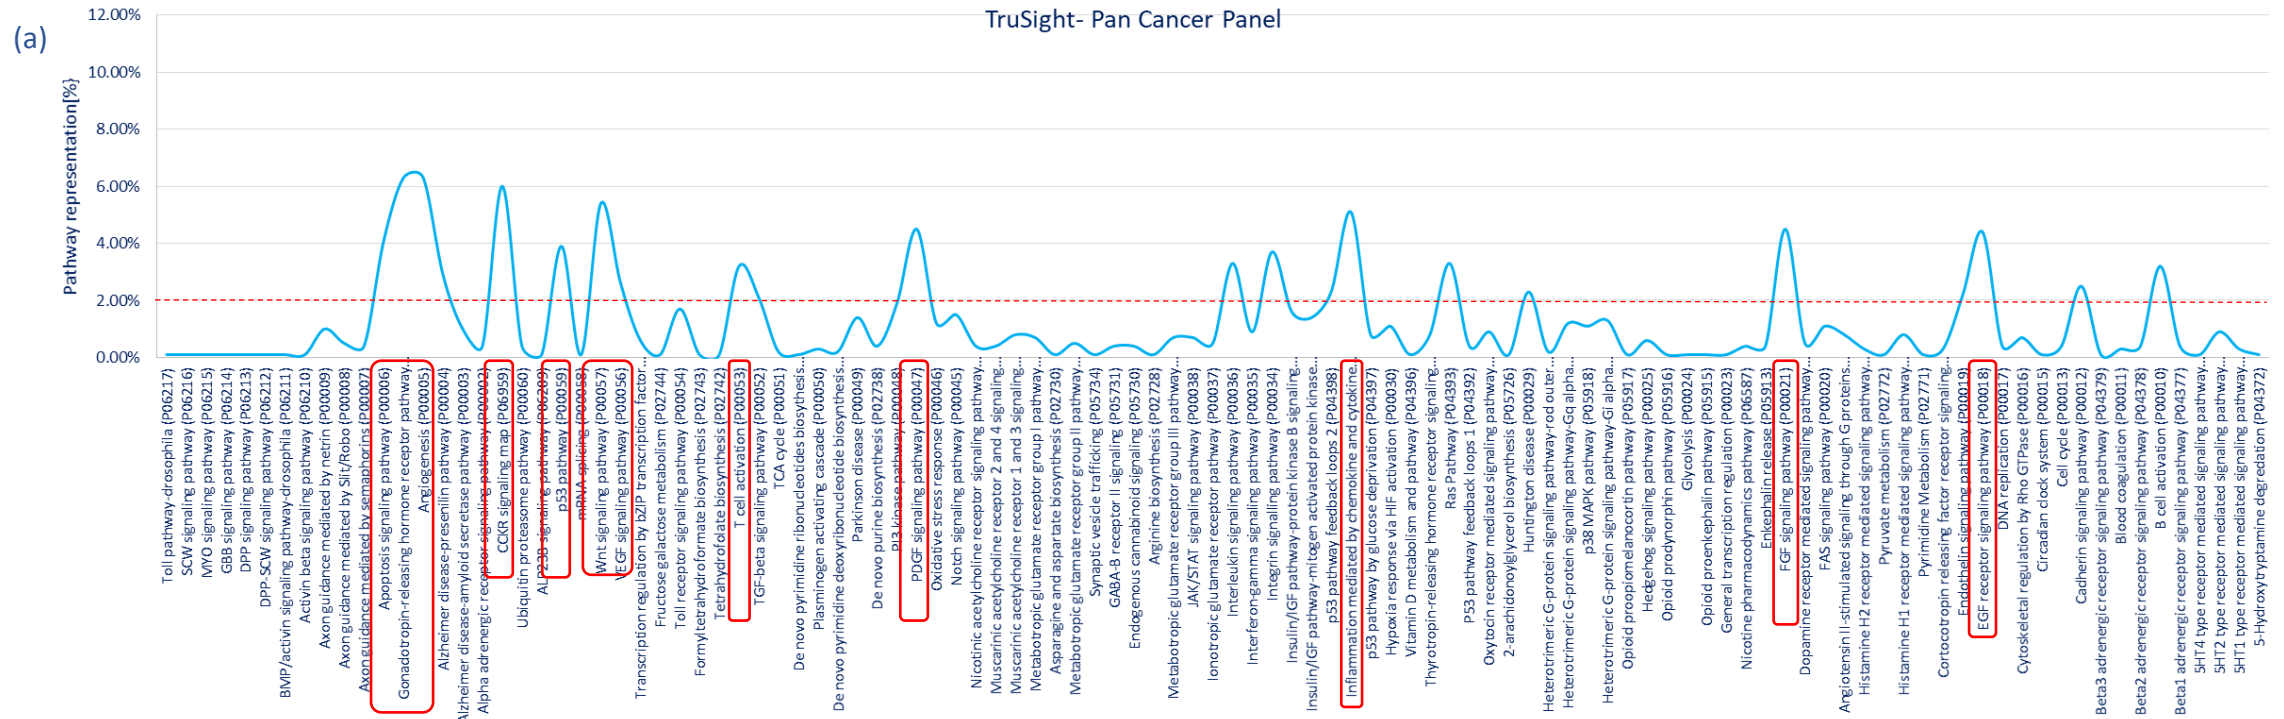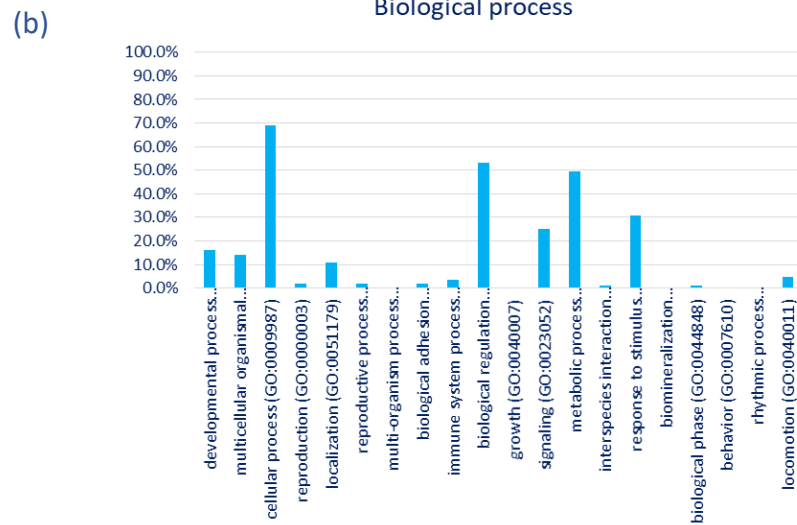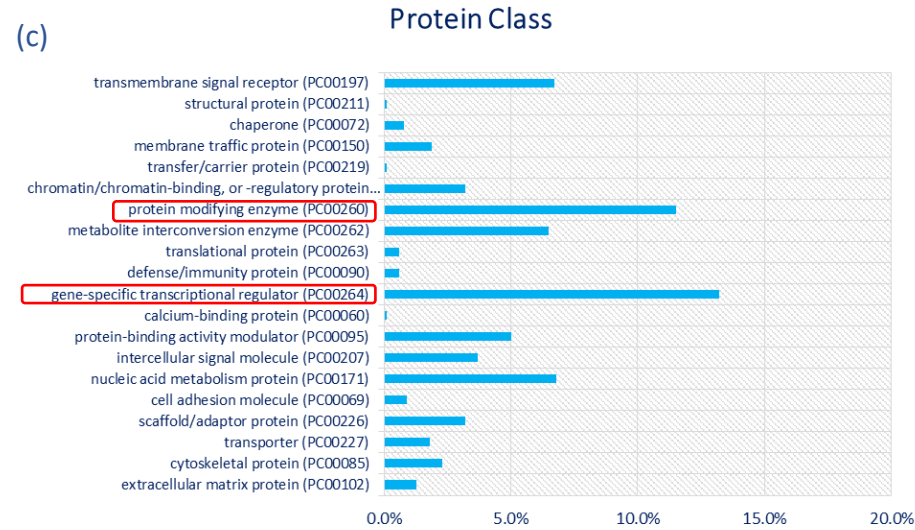

Figure S7

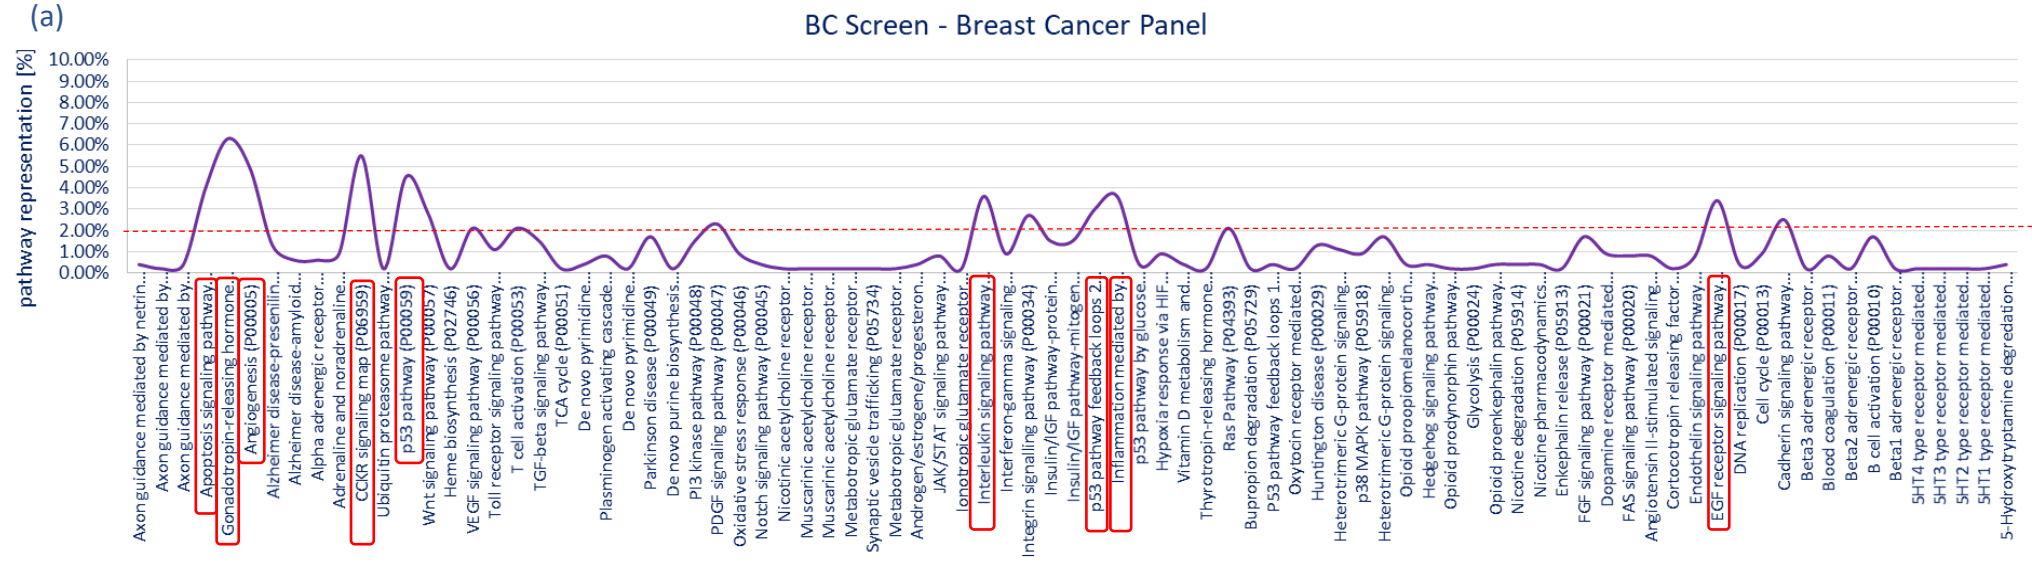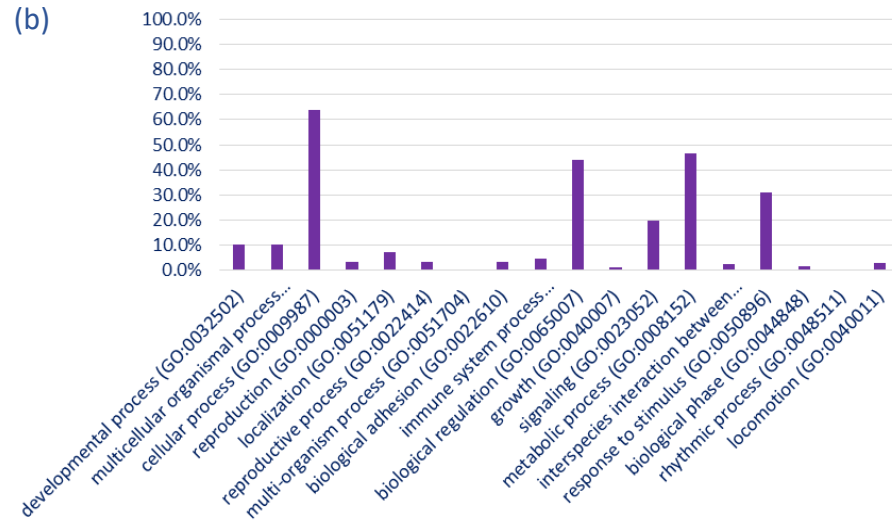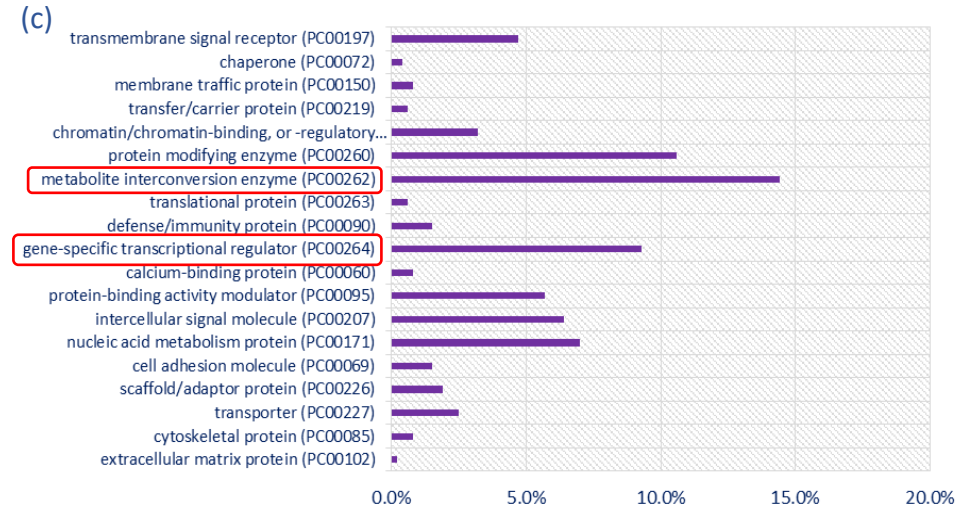

**Figures S1-S7. *Classification of proteins and pathways.*** Quantigene (3 panels: cancer pathway, stress & toxicity and epigenetic and chromatin modification) (S1-S3), The Attagene-cis-factorial (S4), nCounter Pan Cancer (S5), Trusight Pan Cancer (S6), BC Screen model (S7) transcriptomics-based assays were described using the PANTHER (Protein ANalysis THrough Evolutionary Relationships) Classification System [<http://www.pantherdb.org/>; (Mi et al. NAR 2013; Thomas et al., Genome Research 2003)]. PANTHER Analysis allowed a preliminary classification of proteins (and their genes) of each single transcriptomics-based assay. a) Percent representation of pathways; b) Percent representation of biological processes, based on GO annotations. c) Percent representation of protein classes. Red boxes identify most represented pathways, biological processes or protein classes within each single assay.
