# Supplementary material for: Analyses of Transcriptomics Cell Signalling for Pre-Screening Applications in the Integrated Approach for Testing and Assessment of Non-Genotoxic Carcinogens
Source: Int J Mol Sci. 2022 Oct 22;23(21):12718. doi: 10.3390/ijms232112718 (PMC9659232; doi:10.3390/ijms232112718)
Supplement: Supplementary file 1 [file ijms-23-12718-s001.zip › Table S1rev.xlsx]

## Sheet: Table S1
Table S1: The genes in the selected gene sets in Table 3
HALLMARK_XENOBIOTIC_METABOLISM	HALLMARK_ANDROGEN_RESPONSE	HALLMARK_ESTROGEN_RESPONSE_EARLY	HALLMARK_ESTROGEN_RESPONSE_LATE	RELA_DN.V1_DN	RELA_DN.V1_UP	HALLMARK_IL6_JAK_STAT3_SIGNALING	HALLMARK_INFLAMMATORY_RESPONSE	HALLMARK_INTERFERON_ALPHA_RESPONSE	HALLMARK_INTERFERON_GAMMA_RESPONSE	IL15_UP.V1_DN	IL15_UP.V1_UP	IL21_UP.V1_DN	IL21_UP.V1_UP	IL2_UP.V1_DN	IL2_UP.V1_UP	JAK2_DN.V1_DN	JAK2_DN.V1_UP	HALLMARK_REACTIVE_OXYGEN_SPECIES_PATHWAY	NFE2L2.V2	HALLMARK_HYPOXIA	EGFR_UP.V1_DN	EGFR_UP.V1_UP	ERBB2_UP.V1_DN	ERBB2_UP.V1_UP	KRAS.600_UP.V1_DN	KRAS.600_UP.V1_UP	RAF_UP.V1_DN	RAF_UP.V1_UP	MEK_UP.V1_DN	MEK_UP.V1_UP	AKT_UP.V1_DN	AKT_UP.V1_UP	PTEN_DN.V1_DN	PTEN_DN.V1_UP	MTOR_UP.V1_DN	MTOR_UP.V1_UP	MYC_UP.V1_DN	MYC_UP.V1_UP	YAP1_DN	YAP1_UP	WNT_UP.V1_DN	WNT_UP.V1_UP	BCAT.100_UP.V1_DN	BCAT.100_UP.V1_UP	LEF1_UP.V1_DN	LEF1_UP.V1_UP	TGFB_UP.V1_DN	TGFB_UP.V1_UP	NOTCH_DN.V1_DN
ABCC2	ABCC4	ABAT	ABCA3	ADGRE1	ADAMTS13	A2M	ABCA1	ADAR	ADAR	ABCD2	ACVRL1	A1CF	AATK	A1CF	AATK	ABHD18	ABCB4	ABCC1	ABCB6	ACKR3	ABLIM1	A2M	AASDHPPT	ABCC3	ABCB1	A2M	ABAT	AAK1	ABCA12	ABCC3	ACKR3	ABCA7	ABCA6	ACSS3	ABCA1	ABCA2	ABHD3	ABCC4	ACOX2	ARHGEF10	AARD	A4GALT	AMH	ABCB1	ACSF2	ADAM19	ACKR3	ABCG1	ABCA1
ABCC3	ABHD2	ABCA3	ABHD2	ADRA1D	AGPAT4	ACVR1B	ABI1	B2M	APOL6	AC104849.1	ADAM19	A4GNT	ABCA6	A4GNT	ABTB2	ADAMTSL4	ACTA2	ATOX1	ABCC2	ADM	ACKR3	ABCC3	ABLIM1	ABCG1	ABCB11	AC073648.1	ABCA12	ABCC3	ABLIM1	ABCC4	ADGRL1	ACOT9	ACOX2	ADGRB2	ACKR3	ADORA2B	AC004264.1	ABCC6P2	APOBEC2	BICRA	ABCA1	ACKR4	B9D2	ARHGEF5	ACSL5	ADAMTS8	ADAMTS1	ABTB2	ABCB9
ABCD2	ACSL3	ABHD2	ACOX2	APCS	AP4E1	ACVRL1	ACVR1B	BATF2	ARID5B	ACTN2	AHR	AC104849.1	ABCB11	ABCD2	ADAM19	ALDH8A1	ADCYAP1R1	CAT	ABHD4	ADORA2B	ADD3	ACTG2	ACTR6	ACHE	ABCG4	ACOX2	ABLIM1	ABCC4	ACTR6	ABCG1	ADHFE1	ADAM10	ACSBG2	ADRA2A	ADAMTS8	ADRA1B	ACAT2	ADGRE2	C6orf58	C15orf65	ABCC3	ADAM28	C22orf46	BIK	AGR2	ADGRE2	ADGRE3	ACSBG1	ACADL
ABHD6	ACTN1	ABLIM1	ADD3	ATP6V0A4	APBA2	BAK1	ACVR2A	BST2	ARL4A	ADAM12	AIM2	ACHE	ABCC8	ACP3	AHR	AMT	ADGRB1	CDKN2D	AC020928.1	AK4	AGL	ADM	ADAM9	AKR1B10	ACKR3	ADAM19	ACKR3	ABHD6	AGL	ACSL1	ALPL	ADGRG1	ADAM2	ADRA2C	AOC3	ADRA2B	ADGRF1	AGPAT3	CACNB4	C8orf48	ACKR1	ADGRB1	CCN6	BMP4	AKR1C3	ADGRG2	ADRB2	ADAM22	ACKR3
ACO2	ADAMTS1	ADCY1	AFF1	AVP	APOB	CBL	ADGRE1	C1S	AUTS2	ADAM29	AK4P3	ACVR2A	AGAP2	ADAM2	AIM2	ANKRD36B	AFF3	EGLN2	ACKR3	AKAP12	ALG13	AGO2	ADD3	AKR1C2	ACTG2	ADAM8	ADGRG1	ACOX1	AK4P3	ADGRL2	AMPD2	ADH4	ADCYAP1R1	ALOX5AP	AQP5	AK4	ADHFE1	AHSA1	CBLL2	C8orf58	ACVR1B	ADGRG3	CDH12	CAVIN1	ALCAM	ADIRF	ANGPTL4	AKAP12	ADTRP
ACOX1	ADRM1	ADCY9	AGR2	BMPR1B	+	CCL7	ADM	CASP1	B2M	ADAMTS2	AMD1	ADAM28	AGMAT	AFDN-DT	AK4P3	ATM	AGTR2	ERCC2	ACOT11	ALDOA	ANGEL2	AKAP12	AGL	ALDH4A1	ADAMTS9	ADCYAP1R1	AGR2	ACSL1	ALG13	ADM	ANGPTL4	ADORA2B	ADGRE5	AQP1	ARTN	ALDOC	AGER	ALG3	CCDC87	CAMK4	ADAM12	AKR1B1	CHRNA2	CD9	ALDH5A1	AKAP12	ANKMY1	ANK1	AIPL1
ACOX2	AKAP12	ADD3	ALDH3A2	C1orf21	ATP2A1	CCR1	ADORA2B	CASP8	BANK1	ADGRL4	ANKRD36BP2	ADAM7	AIM2	AGBL2	ALDH4A1	ATP8B1	AKAP6	FES	ACP7	ALDOB	ANK3	ALAS1	ALG13	ALDOC	ADRA2B	ADGRA2	AK4	ACSL4	AMIGO2	AGAP1	AQP5	AK4	AGXT	ARHGDIG	B3GALNT2	ALPK2	AGO4	AMPD2	CHCHD3	CCDC8	ADAM19	AP1B1	CPLANE1	CDX2	ANK3	ALLC	ANKMY2	ANKLE2	ALLC
ACOX3	AKT1	AFF1	ALDH3B1	C5AR2	ATP5F1C	CD14	ADRM1	CCRL2	BATF2	ADRA1B	AP3M2	ADGB	ALDH4A1	AIRE	AMIGO2	C8orf44	ALPL	FTL	ACTL8	ALDOC	ANXA9	ANGPTL4	AMIGO2	ANGPTL4	AKR1B10	ALDH8A1	AK4P3	ACYP1	ANGEL2	AKR1B10	ASF1A	ALDOC	ALX3	ASPN	BACE1	ANKRD33	AKR1C3	ANO2	DOCK11	CDIPT	ADAM2	AP1G2	DAZL	CFAP74	ANKFY1	ANO1	AP1AR	ARHGAP12	AMOTL2
ACP1	ALDH1A3	AKAP1	AMFR	C7	ATP8A2	CD36	AHR	CD47	BPGM	AFDN-DT	APLP1	ADGRL4	AMN	ALG12	ANXA2P1	CAPRIN2	ANXA2P1	G6PD	ACVRL1	AMPD3	AOPEP	AOX1	ANKRD12	ANKMY2	AMBN	ALPI	ALCAM	ALAS1	ANXA9	AKR1C2	ASS1	ANGPTL1	ANKRD34C	ATP6V1B1	BBS2	AP2B1	ANGPTL4	APOA4	FAM122C	CDK14	ADAR	AP2S1	DEPP1	CHODL	AP1M2	APOBEC3G	ARID5B	ATF3	AOPEP
ACP2	ANKH	ALDH3B1	ANXA9	CA9	BCO1	CD38	APLNR	CD74	BST2	AKAP5	APOBR	ADRA1B	ANKRD7	AMELY	AP3M2	CARF	ANXA2P3	GCLC	ADAMTS12	ANGPTL4	APBB2	APOBEC3B	ANXA3	ANXA6	ANKRD1	AMBP	AOPEP	ALPP	AOPEP	AKR1C3	AXIN2	ANXA13	ANKRD53	AZU1	C1QTNF4	APOOL	ARNTL	B3GNTL1	FICD	CNP	ADCY4	ATP4B	DKFZP434A062	CRYM	ATP1B1	ARC	ATRNL1	BCOR	ARHGAP6
ACSM1	APPBP2	AMFR	AREG	CALY	BIN1	CD44	AQP9	CMPK2	BTG1	AL109918.1	BMP2	ADTRP	ANXA2P1	APOBEC1	ASCL3	CCNL1	ASGR1	GCLM	ADGRE3	ANKZF1	ARL3	ARAP2	AOPEP	APH1B	APBB3	ANGPTL4	APBB2	ANGPTL4	APBB2	ALDH1A3	BCS1L	ARG1	ARL17A	B3GAT1	C1R	ASB11	ARRDC3	C12orf66	GOLGA2P5	COX8A	ADRB1	AURKB	DOCK3	DBNDD1	ATP2A1	ARG2	AVPI1	BHLHE40	ARSD
ADH1C	ARID5B	ANXA9	ARL3	CAPN9	BPNT1	CD9	ATP2A2	CMTR1	C1R	AMELY	C19orf73	AIRE	ARG1	ARHGAP6	ASPA	CDH3	ASGR2	GLRX	ADH6	ANXA2	ARL4A	ARFGAP3	ARHGAP29	APLP1	APOB	ANK3	ARL3	ANKMY2	AQR	ALDH3A1	BEX4	ASB11	ASIP	BCL2L14	C2	ATF3	ASAP3	C19orf48	GPR50	CXorf56	AGT	BCL7C	DSG3	DEFA5	ATP8A1	ARHGAP4	BAG4	BHMT	ATP8B3
ADH5	AZGP1	AQP3	ASCL1	CCNK	CCL2	CNTFR	ATP2B1	CNP	C1S	APOBEC1	C9	AP3B2	ARHGAP22	ARL4C	ATG101	CDRT4	ATP8B3	GLRX2	ADRA1A	ATF3	ARMC9	ARID5B	ARMCX1	APOBEC3B	APOL3	ANKRD34C	ARMC9	ANKRD6	ARMCX1	ALDH4A1	BLVRB	ATF3	ATG16L1	BDNF	CCDC134	ATXN7L1	ATL1	C20orf27	GUCY2C	CYP4B1	AIRE	BTG4	EBLN2	DKK1	BDH2	ARID3B	BCL6	BMPR2	BAIAP2
ADH7	B2M	AR	ASS1	CD247	CD38	CRLF2	ATP2C1	CSF1	CASP1	ARHGEF10	CALML4	ASPHD1	ARHGAP32	ARNT2	BMP2	CEP152	ATRNL1	GPX3	AGT	ATP7A	ARMCX1	ARNT2	ARMCX5	AQP3	AQP6	ANO1	ARNT2	ARHGAP26	ARMCX3	ANGPTL4	BTBD2	BACE2	ATP8B3	BMP10	CCT6B	BACH2	ATXN7L3	C5orf46	HEY1	DDB2	AKR1E2	C8G	EXOC3	DNAJC3	BDKRB2	AUTS2	BDKRB2	BRDT	BBOX1
AHCY	B4GALT1	AREG	ATP2B4	CD53	CDHR5	CSF1	AXL	CXCL10	CASP3	ARL4C	CALML5	BCL2L10	BAIAP3	ASPHD1	BTC	CEP295	BHLHB9	GPX4	AIFM2	B3GALT6	ASCL1	ASPH	ARMT1	ARNT2	ARHGAP28	ANPEP	ASCL1	ARHGEF3	ARMCX5	ANOS1	C11orf71	BID	ATXN3L	BMP7	CDC42BPA	BDH1	B9D2	CALML4	IL4R	DENND10	APC2	CCDC86	FZD4	DUSP4	BTN3A3	AXL	BET1L	CAPRIN2	BCAS1
AKR1C2	BMPR1B	ARL3	BAG1	CDON	CDK5R2	CSF2	BDKRB1	CXCL11	CASP4	ASPHD1	CAPN10	BEST2	BCL6	ATP2C2	C11orf80	CEP41	BMP2	GSR	AKR1B1	B4GALNT2	ATF7IP	ATF3	ASCL1	ASPH	ARHGEF38	APOBEC3G	AUTS2	ASPH	ASCL1	APOD	C1R	BPGM	B3GALT5	BMPR1B	CES3	BID	BANF2	CAMKMT	IQCF1	DLX5	ASH2L	CCL2	GLRA2	DUSP6	C1orf115	BMP7	BIRC3	CARF	C3AR1
AKR1C3	CAMKK2	ASB13	BATF	CH25H	CDKN2B	CSF2RA	BEST1	DDX60	CASP7	ATP10B	CCDC85B	BICDL1	BET1L	BICDL1	CALML4	CEP97	C8A	HHEX	AKR1B10	BCAN	BAZ2B	ATXN1	ASS1	ATP6V0A4	ART1	APOD	B3GALNT1	B3GNT3	ASS1	AQP3	C1S	C3orf52	B4GALNT1	C11orf16	CHRD	BLK	BCAR1	CAPS	ITGA2	DRAM2	ATP7B	CCR3	H2AC18	EEF1A2	C4BPB	C14orf132	C14orf93	CASP5	C3orf18
ALAS1	CCND1	B4GALT1	BCL2	CHIT1	CELP	CSF2RB	BST2	DHX58	CASP8	ATP6V0A4	CCL21	BTBD3	BMP10	BTN3A1	CAPN10	CMC1	C9	HMOX2	AKR1B10P1	BCL2	BCL2	BACE2	ATF1	ATXN1	ATP2A3	ARHGAP24	BAG3	BACE2	ATF1	AREL1	CAP2	CALCB	BMERB1	C2	CHST12	BST2	BCL9	CCDC124	ITGBL1	FAF2	BIK	CCR8	IGFBP5	EFEMP1	CAT	CARD9	C18orf25	CCDC93	CA2
ALDH2	CCND3	BAG1	BLVRB	CLCN1	CHST1	CSF3R	BTG2	EIF2AK2	CCL2	ATP8A1	CCL4	CACNA2D3	BOK	BTN3A3	CCDC85B	COL26A1	CACNB4	IPCEF1	AKR1B15	BGN	BDH1	BCL3	ATP8B1	B3GALT4	ATP6V1B1	ARL4C	BAMBI	BLNK	ATF3	ARHGDIB	CAV2	CAMKK1	BTBD18	C5	CIRBP	C9	BCO2	CCDC78	KATNB1	FAM167A	BPGM	CD74	IGHM	ENC1	CCL20	CAVIN3	C19orf57	CCN2	CA4
ALDH3A1	CDC14B	BCL11B	BTG3	CLDN6	CLDN15	CXCL1	C3AR1	ELF1	CCL5	BCL2L10	CCNE1	CCK	C1orf159	CACNA1E	CCN6	CSAD	CBX8	JUNB	AKR1C1	BHLHE40	BDKRB2	BMP7	ATR	BACE2	BBC3	ASIC4	BCL2	BPGM	ATP8B1	ARL4C	CBS	CARD19	C1QTNF1	C8orf17	CLCA3P	CAPN12	C11orf72	CD320	LCA5L	FLOT1	C16orf89	CD96	KIAA0319L	ENO2	CCN2	CBS	C1orf105	CD163	CA8
ALDH9A1	CDK6	BCL2	CA12	CRISP2	CLK1	CXCL10	C5AR1	EPSTI1	CCL7	BEST2	CD3EAP	CCL16	C6	CACNG3	CCR4	CTTNBP2NL	CCIN	LAMTOR5	AKR1C3	BNIP3L	BMERB1	CADPS2	BCL2	BCAM	BCL11B	ASTN1	BMERB1	C1GALT1	AUTS2	ARRB1	CD248	CCNG2	C4BPA	CAMTA1	CLPX	CCAR2	C11orf80	CD3EAP	LIMD1	GTPBP3	CASQ2	CDH5	KLF10	ENPP2	CDH17	CCND2	C8orf44	CD1E	CAPN10
ANGPTL3	CENPN	BHLHE40	CA2	CST1	CRB1	CXCL11	CALCRL	GBP2	CD274	BHLHB9	CD69	CCL24	CAPN10	CAMK1G	CD3EAP	DAPP1	CCL21	LSP1	AKR1C4	BRS3	BRCC3	CAPN2	BMERB1	BCL3	BLNK	ATP1A2	BTBD3	C4orf19	BAZ2B	ASPH	CDC42BPA	CD55	CA6	CAPN11	COL11A2	CCDC86	C11orf95	CDCA7L	LINC00639	KCNK12	CCDC130	CFC1	KLHL4	ETV5	CDK3	CCR7	CAV3	CD3EAP	CCDC70
AOX1	DBI	BLVRB	CACNA2D2	CUBN	CRYGA	CXCL13	CCL17	GBP4	CD38	BICDL1	CDC25A	CD177	CASC1	CBLN1	CD52	DBF4B	CCND1	MBP	AL031666.2	BTG1	BRIP1	CARMIL1	BRWD1	BCL6	BRDT	ATP4A	BTG3	CABYR	BCL2	ATXN1	CDH16	CDKN2B	CAMK1	CCDC102B	COL20A1	CCL5	C16orf74	CFAP70	LONRF2	LLGL1	CD44	CHRNA7	KRT19P2	FGF20	CDX2	CD302	CAVIN2	CDK17	CCDC81
AP4B1	DHCR24	CA12	CALCR	CXCL10	CST5	CXCL3	CCL2	GMPR	CD40	C14orf132	CDH3	CD40LG	CBL	CCDC81	CD69	DBH	CCR2	MGST1	AL845331.2	CA12	BST2	CASP7	BST2	BMPR1B	BST2	ATXN3L	CA12	CAMK2N1	BLNK	B3GNT3	CDPF1	CIR1	CAMK1D	CCN5	COQ8A	CD300LD	C1orf159	CGREF1	MOBP	MAML2	CD48	CHRNB2	KRT32	FLVCR2	CFTR	CDA	CCDC130	CDKN2B	CCNK
APOE	DNAJB9	CALB2	CAV1	CXCL11	CTF1	CXCL9	CCL20	HELZ2	CD69	C19orf57	CENPT	CD72	CCKAR	CCNG2	CDC25A	DCAF13	CD8B	MPO	ALB	CASP6	BTG3	CBLB	BTG3	BNIP3L	C1QL1	AURKC	CALB2	CAPN2	BMERB1	BACE2	CELA1	CLMN	CAND2	CCNP	CPE	CDC20	C1orf54	CHCHD10	MYLIP	MOCS2	CD5	CKAP4	KRTAP4-7	FUT1	CLEC2D	CDKN2A	CCDC51	CHST11	CD209
AQP9	ELK4	CALCR	CCN5	CXCR3	CYP26B1	DNTT	CCL22	HERC6	CD74	CACNA1E	CISH	CEL	CD6	CCNP	CDCP1	DGKE	CDH11	MSRA	ALDH3A1	CAV1	CADM1	CCDC68	C1orf109	C1orf115	C22orf31	BEX1	CALCR	CAPN6	BST2	BCAM	CHAD	COMTD1	CCDC68	CD1E	CRY2	CDH17	C20orf181	CHKA	MYO1B	MSN	CD79B	CKMT2	NAA80	GAD1	CNN3	CEACAM21	CDK2AP1	CHST3	CD27
ARG1	ELL2	CANT1	CCNA1	CYTIP	DAPP1	EBI3	CCL24	HLA-C	CD86	CACNG3	CLSTN3	CEP41	CD79B	CD160	CDH3	DIP2A	CDH5	NDUFA6	ALDH3A2	CAVIN1	CALB2	CCL2	C2CD5	CA8	C5AR2	BMP7	CASK	CAPRIN2	CALB2	BCL3	CHN2	CRLF1	CCL16	CD27	CSAD	CDK1	CA7	COQ8A	ORC2	MYLK	CD93	CLDN6	PIP	GADD45G	COCH	CHGB	CDKN1B	CKMT2	CD82
ARG2	ELOVL5	CBFA2T3	CCND1	DCSTAMP	DEFB1	FAS	CCL5	IFI27	CDKN1A	CCNG2	CNNM4	CFAP74	CDH3	CD34	CISH	DLL3	CDKL2	NDUFB4	ALDH7A1	CAVIN3	CALCR	CCL22	CALB2	CADPS2	C8A	C1QTNF1	CAV1	CAST	CALCR	BMP7	CHST12	CTRB1	CCN6	CDIP1	CSDC2	CDKN2B	CCDC82	DCAF4	PDIK1L	NMRK1	CDO1	CLDN8	PMCH	GCNT1	CPE	CHST10	CHRND	CLCF1	CEL
ARPP19	FADS1	CCN5	CD44	DLK1	DEPP1	GRB2	CCL7	IFI30	CFB	CCR2	CPA4	CHFR	CDH5	CD72	CLDN5	DMTF1	CHST4	NDUFS2	ALOX12P2	CCN1	CARF	CCN1	CASP6	CAMK2N1	CA5B	CALB1	CBFA2T3	CCR1	CASP8	C11orf95	CNN2	CXCL16	CCT8L2	CDKL2	CSGALNACT2	CMA1	CCL20	DCTPP1	PIGO	NRAS	CEACAM1	CLEC16A	PRELID3A	HBA2	CPOX	CHST11	CHRNG	COL16A1	CHIA
ASL	FKBP5	CCND1	CD9	DNAJC15	DGKI	HAX1	CCR7	IFI35	CFH	CD177	CXCL12	CHGB	CFD	CDKN1C	CNKSR2	DOCK5	CIDEA	NQO1	AMBP	CCN2	CASP6	CCN2	CAV1	CAPN2	CACNA1I	CCNJL	CCDC170	CD44	CBR4	C1orf115	COL17A1	CYP51A1	CD3D	CELSR2	CSRP2	CMBL	CD1D	DDX10	PRCC	PRKACG	CELF1	CLEC4E	PRKN	HOXA1	CRYBG1	CHST2	CHST7	CRYAB	CHRND
ATOH8	GNAI3	CD44	CDC20	DNMT3A	DLGAP1	HMOX1	CCRL2	IFI44	CIITA	CD72	CYP7A1	CIDEA	CHI3L1	CEL	CXCL12	DPY19L2P2	CLCNKB	OXSR1	ANKS6	CCN5	CAV1	CEACAM6	CBR4	CAPN5	CADM4	CCR6	CCDC22	CDC42EP3	CCN5	CADPS2	CSDC2	DHCR24	CDH10	CHRNB1	CTNS	COA7	CDCA8	DENND2D	RCC1L	PTPMT1	CFHR1	CNGA2	RALGPS2	HYAL3	CTSH	COL6A1	CITED2	CSF1R	CHST1
ATP2A2	GPD1L	CELSR1	CDC6	DSG3	DNMT3L	IFNAR1	CD14	IFI44L	CMKLR1	CDKN1C	DGKG	CLDN10	CLDN6	CFAP44	CXCL3	DSCAM	CLDN7	PDLIM1	AQP4-AS1	CCNG2	CBFA2T3	CEBPD	CCDC59	CAST	CALCB	CD1A	CCDC6	CDK18	CETN3	CAMK2N1	DNAJA3	DHCR7	CDH11	CLEC1B	CXCL1	COMTD1	CDKL5	DGAT2	RFX1	RAB40C	CLEC4D	COL4A4	SERGEF	IHH	CXCL2	COL9A3	CLEC2B	CSNK1E	CIDEB
BCAR1	GSR	CELSR2	CDH1	DUOX2	DUSP8	IFNGR1	CD40	IFIH1	CMPK2	CEACAM7	DHRS3	CLEC7A	CLDN7	CHGB	DGKG	DYM	CNKSR2	PFKP	ARHGAP28	CDKN1A	CBR4	CEMIP	CCN5	CDS2	CALML3	CD80	CCN5	CEBPD	CHN1	CAPN2	DPT	DLG4	CDH22	CLPS	DDIT3	COQ4	CLCA4	DGKD	RHBDL1	RFTN1	CLN3	CPS1	SNAI2	IRS1	CXCL5	CRABP2	COL4A1	CST6	CLIC2
BCAT1	GUCY1A1	CHPT1	CELSR2	ECEL1	DYSF	IFNGR2	CD48	IFIT2	CMTR1	CFAP44	DLX2	CMKLR1	CLSTN3	CHRNB4	DHRS3	ECM2	COL4A6	PRDX1	ARHGAP8	CDKN1B	CCN5	CLDN1	CEBPZ	CEACAM5	CALML5	CDHR2	CCND1	CEP70	COL9A3	CAPN5	DRAM1	DNAJB13	CDO1	CLTCL1	DENND1A	CPPED1	CLIP2	DIS3L	RNF227	RGCC	CMBL	CRMP1	TBX5	ITGA9	CYP1B1	CRIP1	CXADR	CYP24A1	CLSTN3
BLVRB	H1-0	CISH	CHPT1	EGFL6	EFNA1	IL10RB	CD55	IFIT3	CSF2RB	CHIT1	DUSP2	CNTN2	CNNM4	CLCA1	DUSP2	EEF1G	COL6A3	PRDX2	ASF1A	CDKN1C	CELSR2	CMAHP	CENPE	CEACAM6	CAMK1D	CDK2AP2P3	CELSR2	CERK	CSTA	CBLB	EDARADD	DUSP10	CHI3L1	CNR2	DNASE2	CTRB1	CLSTN3	DLL3	SLC17A7	RHOQ	CMPK2	CXCL1	TENT5A	LBP	CYP26B1	CST7	CXCL1	CYP26B1	CNGB3
BPHL	HERC3	CLDN7	CHST8	ERC2-IT1	EGR1	IL12RB1	CD69	IFITM1	CXCL10	CLDN11	DUSP4	CNTNAP3B	COL15A1	CLDN16	DUSP4	EPM2AIP1	CPED1	PRDX4	ASIP	CHST2	CENPU	COL5A2	CETN3	CEMIP	CATSPERB	CDK5R1	CHST15	CGA	CYP26B1	CCNJL	EFEMP1	EDN1	CHST10	COL15A1	DNMBP	CYP26A1	COP1	DPP7	SLC6A5	RPN2	CNTN1	CYP2E1	TLN2	LMO2	CYP2J2	CTH	CXCL2	CYP2J2	COQ8B
CA2	HMGCR	CLIC3	CISH	F13B	EGR3	IL13RA1	CD70	IFITM2	CXCL11	CLEC2B	DUSP6	CORO2A	CPA4	CLEC2B	DUSP6	EREG	CRCT1	PRDX6	ASNS	CHST3	CHN1	COTL1	CHD1	CHST11	CBL	CDR1	CLIC3	CLDN1	DCAF6	CDC42BPB	EFEMP2	ERO1A	CHST7	COL26A1	DPEP1	CYP51A1	CPNE2	DPYSL5	SLC9A1	SAMSN1	COL9A1	CYP2S1	TMPRSS2	LY6G6D	DAPK1	CXCR1	CYP2E1	CYTH1	CPNE6
CASP6	HMGCS1	CXCL12	CKB	FMO5	ESM1	IL15RA	CD82	IFITM3	CXCL9	CLGN	ECM1	CRYGB	CT62	CNR2	EGR1	ERO1B	CRYBA2	PRNP	ATP5MC3	CITED2	CLK4	CRISPLD2	CLIC3	CLMN	CCDC102B	CEACAM1	COL9A3	CLMN	DDX58	CEACAM5	EIF4E3	FABP5	CLDN10	COPG2	DTX2	DBF4	CXCL3	DUSP2	TAS2R7	SEMA3C	CORT	CYP4A22	TTR	MICU1	DDX58	CXCR4	DDX58	DACT1	CR2
CAT	HOMER2	CYP26B1	CLIC3	FTCD	ETFDH	IL17RA	CDKN1A	IL15	DDX58	CNTN1	EGR1	CUX2	CTSG	COLQ	EGR2	ETNPPL	CSN1S1	PTPA	ATPAF1	COL5A1	COL9A3	CSGALNACT1	COL9A3	CNOT8	CCDC33	CEACAM3	CPE	CORO1A	DDX60	CEACAM6	ESR2	FAM3B	CLDN14	CPVL	DUSP1	DHCR24	CXXC1P1	ECE2	TEX101	SHISA4	CPN1	DBP	WASHC3	PLEKHF1	DECR1	CYBRD1	DUSP4	DDC	CRH
CBR1	HPGD	DEPTOR	COX6C	GCNT1	F3	IL17RB	CHST2	IL4R	DDX60	CNTNAP3B	EGR2	CYP3A5	CXCL12	CRYBG2	EGR3	EXOC4	CSPG4	SBNO2	AXIN2	CP	CPE	CTNNAL1	CPOX	CREB3L2	CCR8	CEL	CRABP1	COTL1	DLC1	CEMIP	EXOSC1	FBXO6	COQ8B	CSH2	EDRF1	DHCR7	CYP4F29P	EEF1AKMT1	THNSL1	SHLD2	CSF2RB	DCC	ZNF711	PPP1R1A	DISC1	DBN1	DUSP6	DGCR11	CRHR2
CCL25	HSD17B14	DHCR7	CPE	GDF5	F9	IL18R1	CLEC5A	IL7	DHX58	CRHBP	EGR3	CYP46A1	CYP27A1	CST1	EHD2	FAN1	CSTA	SCAF4	B4GALNT1	CSRP2	CSTA	CXADR	CUL5	CRLF1	CD207	CEND1	CRNKL1	CREB3L2	EGR3	CHKA	FAH	FDFT1	CORO7	CYB5R2	EFEMP2	DLG4	DEPP1	EEF1E1	TIMP3	SIAE	CYBA	DHCR24	ZNF749	QPCT	DIXDC1	DCLK1	EHF	DLC1	CRMP1
CD36	IDI1	DHRS2	CXCL12	GNMT	FGF17	IL1B	CMKLR1	IRF1	EIF2AK2	CRYGB	ELMO3	DGCR5	DGKG	CUX2	ELMO3	FBXO22	CXCR1	SELENOS	BCAN	CXCR4	CTSH	CYP1B1	CYP26B1	CSGALNACT1	CD248	CFAP69	CRYBG1	CRIM1	ELAPOR1	CHST11	FAM20C	FLT1	CPLX2	CYP11B1	EXOSC1	DUOXA1	DSG1	ESF1	TSPY26P	SNAP23	CYTH1	DNAJB13		RBP1	DMXL2	DENND1C	EHHADH	DPY19L1	CST1
CDA	INPP4B	DHRS3	CXCL14	GNRH2	FGF2	IL1R1	CSF1	IRF2	EIF4E3	CST2	ETV4	DGKQ	DIRAS3	CXCR2	ESRP2	FBXW12	CYP1B1	SOD1	BCAS1	DCN	CYBA	CYP27B1	DBF4	CSTA	CD300A	CFHR2	CSTA	CRISPLD2	ELOVL5	CLDN4	FANK1	FXR2	CXCL11	CYP26A1	FAH	EEF1E1	DUSP18	EXOSC5	UGT2B4	SNX7	DDX25	DPYSL4		RUNX1	DPP4	DHRS2	EIF2AK3	DYRK2	CXCR3
CDO1	INSIG1	DLC1	CYP26B1	GPER1	FHL5	IL1R2	CSF3	IRF7	EPSTI1	CUX2	FAM214B	DIRAS2	DLX6	CXorf21	EVPL	FKBP11	CYP2B7P	SOD2	BCAT1	DDIT3	CYP26B1	DBNDD2	DDX58	CXADR	CD36	CGA	CSTF2T	CSGALNACT1	ELOVL6	CLDN9	FAS	GAK	CXCR6	CYP39A1	FANK1	ELF5	EREG	EXOSC9	VSNL1	TEAD1	DDX46	DTNB		SASH3	DPYSL3	DKK1	ENTPD7	EDN1	CYP4F2
CES1	IQGAP2	DYNLT3	CYP4F11	GPR3	FLRT1	IL2RA	CSF3R	IRF9	FAS	CXorf21	FAM215A	DMRT1	DNASE1L2	CYP46A1	EVX1	FLCN	DGKQ	SRXN1	BCL2L11	DDIT4	DCAF6	DRAM1	DDX60	CXCL8	CD40LG	CHGA	CTNNAL1	CYP1B1	F12	CLMN	FBXO32	GCH1	CYP4F11	CYRIA	FBXO32	ERN1	FBXO27	FAM216A	WSCD2	WASHC4	DIO2	EDA		SERPINI1	DYNC2LI1	DKK4	EVI2A	ELK3	CYP7B1
CFB	ITGAV	EGR3	DCXR	GSTM1	FOS	IL2RG	CX3CL1	ISG15	FCGR1A	CYB5R2	FAM3C	DNAH7	DPYSL4	DDX58	F2RL2	GABBR1	DLGAP1	STK25	BRINP3	DPYSL4	DDX60	DUSP4	DEPDC1	CXCR4	CDH16	CHGB	DDIT4	CYRIA	FASTKD1	COL5A2	FHOD3	GDE1	DEFA4	DCC	FN3K	FABP5	FGD2	FAM86C1P	XAGE2	YWHAZ	DNAJC11	ENTPD2		SLC7A8	EFHD1	DLL3	EYA4	ELL2	DCLK2
CNDP2	KLK2	ELF1	DHCR7	H2AC8	FOSB	IL3RA	CXCL10	ISG20	FGL2	DACT1	FLT3LG	DOC2A	DYRK1B	DEPTOR	FLT1	GABRE	DMD	TXN	BRIP1	DTNA	DEPDC1	DUSP5	DLC1	CYP1A1	CEACAM5	CHRNA3	DIDO1	DBNDD2	FKTN	CORO1A	FKBP11	GDPD2	DGKB	DEFA5	FXYD1	FAM131A	FGD6	FARSB	ZBTB39	ZNHIT6	DNAJC4	EYA2		SORBS2	EFNB2	DNAJC6	FAM13A	EPHA4	DDX4
COMT	KLK3	ELF3	DHRS2	H4C13	FOSL1	IL4R	CXCL11	LAMP3	FPR1	DEPTOR	FOS	ECHDC3	ECM1	DLEC1	FLT3LG	GOLGA2P10	DMP1	TXNRD1	C11orf52	DUSP1	DERA	DUSP6	DNAJB14	CYP1B1	CGREF1	CLSTN2	DKK1	DHRS7	FTO	COTL1	FMO2	GIPC1	DMP1	DEFB1	FZD9	FAM3B	GALNTL6	FOS			DNASE1L3	F2R		TBX3	EHF	EDAR	FAM234B	ETS2	DIO2
CROT	KRT19	ELOVL2	DLG5	H4C2	FXYD7	IL6	CXCL6	LAP3	GBP4	DNAI2	FOSL1	EFNA5	EGR2	EFNA4	FOS	GOLGA8A	DOT1L	TXNRD2	C14orf177	EDN2	DLC1	EDN1	DTL	DAB2	CHRM2	CLUL1	DLC1	DHTKD1	GALC	CRAT	FMO3	GOT1	DNASE1L2	DMRT1	GDPD2	FDFT1	GAMT	FUT5			DPF3	FABP5		WNT11	EHMT2	EGR2	FANCF	F2RL1	DLK1
CRP	KRT8	ELOVL5	DNAJC1	HAS1	FZD9	IL6ST	CXCL8	LGALS3BP	GBP6	DOCK3	FOXP3	EPS8	EHF	EHHADH	FOSL1	GOLGA8B	DUOX1		C1GALT1P1	EFNA1	DMXL2	EGFR	ECT2	DBNDD2	CHRNG	CMKLR1	DLG5	DSC2	GDAP1	CRLF1	FUT10	GPD2	DUOX2	DOK5	GEMIN2	FDPS	GAS2L2	GEMIN5			EFNB2	FGF18			ELF3	EGR3	FBXL14	FAT4	DNAJC3
CSAD	LIFR	ENDOD1	DNAJC12	HDAC9	GAD1	IL7	CXCL9	LPAR6	GCH1	DOK3	FUT5	F11	ELOVL4	ERC2	FOSL2	GPR1	EDDM3A		C1orf21	EFNA3	DNAJC12	EGLN3	EGR3	DHRS7B	CIITA	COL26A1	DNAJC12	DUSP4	GFRA1	CSGALNACT1	FUT8	GPX2	EIF1AY	DSG3	GRAMD1A	FGFBP1	GBP3	GLRX5			EIF2AK2	FICD			ELL3	ELK3	FBXL15	FERMT2	DOC2A
CYB5A	LMAN1	ESRP2	DUSP2	HOXD3	GADD45B	IL9R	CXCR6	LY6E	GPR18	DTNB	FZD5	F13B	EVX1	EVI2A	FOXP3	GRIK1	EGR4		C1S	EGFR	DTL	ELK3	EHBP1	DNAJC4	CKM	CPA2	EFNB2	EGFR	GNL2	CUEDC1	FXYD1	GPX8	EMP3	EDN1	H1-10	FNDC7	GINS1	GLS2			ETV4	FNTB			ENC1	ELOVL5	FCN3	FGB	DRAM1
CYFIP2	MAF	FAM102A	DYNLT3	HRC	GAS7	INHBE	CYBB	MOV10	GZMA	EBF2	GADD45B	FAM124B	FA2H	EYA1	FZD5	GRM3	EPHA3		CALCA	ENO1	E2F8	ELL2	EIF2S3	DOCK10	CLCA2	CRISP1	EGR3	ENPEP	GOLGA4	CXADR	G6PC2	GSDMC	ETV5	EEF1A2	HIGD1C	FOXI1	GJB5	GP2			F10	FOS			ENTPD3	EMP1	FGF6	FGF1	E2F2
CYP17A1	MAK	FARP1	EGR3	HSD17B1	GHRH	IRF1	DCBLD2	MVB12A	HELZ2	EFNA1	GPT	FES	FAM107A	F13B	GABARAPL3	GTF2H2B	EPPK1		CAMK1	ENO2	EFHD1	ENPP1	EMC2	DRAM1	CLDN16	CSF2RA	EIF2S3	EPAS1	GOLGA8A	CXCR4	GALNT16	GTF2IRD1	FARP2	EFNB3	HLA-DQB2	FTMT	GPRC5A	GPD1L			FAAH	FOXK1			ERAP2	EMP3	FHL3	FLT4	EPB41L4A
CYP1A1	MAP7	FASN	ELOVL5	HTR3A	GJB1	IRF9	EBI3	MX1	HERC6	ENTPD5	HABP2	FGB	FAT2	FAM110B	GABRB3	GUSBP1	ESRRG		CAMK1G	ENO3	EFNB2	EPAS1	ERI2	DUSP4	CLDN8	CSF3	ELAPOR1	ERAP1	GPER1	CYP1A1	GAS1	GUSB	FBXO17	EPHA4	HOXB5	GABRG2	GRHL1	HLF			FBXO8	FPR2			ERN2	EN2	FNDC3B	FNBP1L	FAIM
CYP1A2	MERTK	FCMR	EMP2	HTR3B	GLS2	ITGA4	EDN1	NCOA7	HIF1A	EPS8	HEG1	FGF16	FOSB	FAM124B	GADD45B	HCG18	FABP1		CAMKK1	ERO1A	EGR3	ERO1A	FAM216A	DUSP6	CLIC3	CSN2	ELOVL2	ETV5	GREB1	CYP1B1	GATAD2B	H2BC14	FCN3	EVI2A	HSD17B1	GCH1	GRID1	HP			FOXN3	FXYD3			FAM172A	EPB41L4A	FOXO4	FOXD1	FAM30A
CYP26A1	MYL12A	FDFT1	ETFB	IDUA	GLYAT	ITGB3	EIF2AK2	NMI	HLA-A	ERC2	HK2	FGF6	FOXD2	FCGR2A	GALNT8	HERC2P3	FAM205BP		CBR1	ERRFI1	EIF2S3	ETHE1	FASTKD1	EDN1	CNGB1	CTNNA2	ENAH	FAM13A	H1-2	DBNDD1	GHR	H4C8	FGR	FAM30A	HSPA1A	GGACT	H2AC6	HS3ST3A1			FZD7	GALNT11			FAM83E	FADS1	FRAT2	FOXF2	FAT2
CYP27A1	NCOA4	FHL2	FABP5	IL17RB	GNRH1	JUN	EMP3	NUB1	HLA-B	ETV2	HOXC8	FRMD4A	FUZ	FLT3	GFAP	HIBADH	FBXO4		CBR3	ETS1	ELAPOR1	ETS2	FBXO5	EGLN3	CNR2	CTNND2	EPB41L2	FBXO3	H2AC11	DBNDD2	GNA14	H4C9	FJX1	FCER1G	HTRA1	GPX2	HEG1	HS6ST2			G0S2	GALNT6			FBXL15	FBXO17	FRMD4B	FZR1	FCGRT
CYP2C18	NDRG1	FKBP4	FAM102A	IL2RG	GPR183	LEPR	EREG	OAS1	HLA-DMA	EVI2A	HRH3	GCNT4	GABRB3	FUT9	GNRH2	HOXA7	FGF20		CBS	EXT1	ELF5	ETV5	FHL2	ENO2	CNTFR	CXCL3	EPB41L4B	FCHSD2	H2AC6	DUSP4	GNMT	HCK	FMNL1	FGF1	HYAL3	GSDMA	HIP1	HSPA6			GABRG2	GDF15			FGFBP1	FGF13	FRS3	GADD45B	FCN1
CYP2E1	NGLY1	FKBP5	FARP1	IL7R	GPR85	LTB	F3	OASL	HLA-DQA1	EYA1	HS3ST1	GDNF	GDF9	FZD2	GPT	HYMAI	FGG		CBWD1	F3	ELOVL2	EXT1	FKTN	EPAS1	COBL	CXCL5	FAM216A	FERMT2	H2AC8	EDN1	GRAMD1A	HIC2	FOLR3	FNBP1L	ICOSLG	GSDMC	HOXB2	HSPBAP1			GBP4	GHRH			FOXA1	FGF3	FSTL3	HCAR3	FMNL2
CYP2J2	NKX3-1	FLNB	FDFT1	KCNA2	GPT	LTBR	FFAR2	OGFR	HLA-DRB1	FAM124B	HS3ST3B1	GJB3	GIPR	FZD3	HABP4	IKZF2	FKBP6		CBWD6	FAM162A	ELOVL5	F2RL1	FLNB	EPB41L4A	COL2A1	CXCR4	FAM234B	FGF1	H2BC10	EFHD2	GSPT2	HIF3A	FOSL1	GABRA5	ID2	GSDME	HOXC4	HSPE1			GFAP	GJD2			FPGT	FGF9	GATA3	HLX	FSTL3
CYP2S1	PA2G4	FOS	FGFR3	KCNJ1	GRAP	MAP3K8	FPR1	PARP12	HLA-G	FASLG	HSD17B14	GPC3	GNAL	GALR3	HEG1	ITGBL1	FLT3LG		CCDC138	FBP1	ENPP4	FADS3	FOLR1	EPHX1	COLEC10	CYP27B1	FANCF	FYN	H2BC6	EGLN3	GSTA4	HOXB9	FST	GADD45G	IFITM1	GSS	IL18	ICAM5			GGNBP1	GLI1			GALC	FHL1	GCH1	HRH1	FUT3
CYP4F2	PDLIM5	FOXC1	FKBP4	KCNJ15	HOOK1	MYD88	FZD5	PARP14	ICAM1	FLG	IL10	GPC4	GPR176	GDF5	HK2	KIF13A	FN3K		CCL17	FOS	EPB41L2	FERMT2	GFRA1	ETV5	CRABP2	DBH	FOS	FZD5	H2BC7	EHBP1L1	HEBP1	IDI1	GABRB1	GAL3ST1	IFT172	H2BC14	IL1R1	IL17D			GPATCH2	GNMT			GALNT12	FJX1	GIT2	HS3ST2	GABRG3
DCXR	PGM3	FRK	FKBP5	KCNK5	HTR1F	OSMR	GABBR1	PARP9	IDO1	FRMD1	IL13	GPR20	GPR85	GOLPH3L	HOXA11	KIRREL1	FOXD1		CCND3	FOSL2	EPS8	FGB	GNL2	FADS2	CRYGD	DCBLD2	FRAT2	GABBR2	H2BC8	ELL2	HIC1	IFIT1	GALNT14	GALR3	IGF1	H6PD	IL6	IPO4			GPX3	GRIN2D			GAREM1	FLNC	GNAI1	HTR1D	GGTLC1
DDAH2	PIAS1	GAB2	FLNB	KLF8	IL1B	PDGFC	GCH1	PLSCR1	IFI27	FSTL3	IL18RAP	GPX2	GRIA4	GPRC5D	HTR4	KMT2A	FOXE3		CD101	FOXO3	EZH2	FGFR3	GOLGA4	FAM174B	CSDC2	DDX6	FTO	GALNT12	H2BC9	ENO2	HMGCS2	IFIT2	GJA10	GDF10	IRS2	HELLS	IRAK2	ISOC2			GRIN2C	HES5			GATA6	FN1	GNE	HYAL1	GNAT3
DDC	PLPP1	GFRA1	FOS	KLK11	INE1	PF4	GNA15	PNPT1	IFI30	FUT2	IL1A	GSR	GRIN2A	GPX2	IFNW1	LINC00115	FRMPD1		CDC45	GAA	FAM234B	FGG	GOLGA8A	FER1L4	CSPG4	DEFA5	FTSJ1	GAREM1	H3C10	EPAS1	HPS1	IFIT3	GNG11	GEMIN7	ISL1	HIVEP3	IRGC	ITPR1			GRM8	HOXD10			GDE1	FNBP1	GOLPH3L	ID3	GPR15
DDT	PMEPA1	GJA1	FOXC1	KLK7	INTS6	PIK3R5	GNAI3	PROCR	IFI35	FZD2	IL5	GUCA1B	GUCY1B1	GUCY1A2	IL10	LINC00937	GALK1		CDH12	GALK1	FAM50A	FHOD1	GPER1	FGF13	CST4	DEFB4A	GALC	GATA2	H4C8	EPHA1	HTRA1	IL1F10	GPM6A	GGTLC2	ITIH5	HMGCS1	JOSD1	JPH1			GSTA4	HOXD3			GDPD3	FNDC4	GPR39	IGLV2-14	GPR32
DHPS	PTK2B	GLA	FRK	KNL1	JUN	PIM1	GP1BA	PSMA3	IFI44	GALR3	INHBB	GUCY1B2	H1-4	H2AC11	IL13	LINC01278	GFPT2		CDKN2B	GAPDH	FANCL	FNDC3B	GREB1	FGFR4	CT55	DHRS9	GAPVD1	GCLM	HERC6	EPHA2	IBSP	IL1R1	H4C4	GJC2	KAT6B	HMOX1	KATNAL1	KLF16			HAND1	HPS4			GRB14	FOSL1	GPRC5C	IL11	GPR65
DHRS1	PTPN21	GREB1	GAL	KRT1	JUNB	PLA2G2A	GPC3	PSMB8	IFI44L	GDNF	IRF2BP1	H2AC15	HABP4	H2AJ	IL18RAP	LONRF1	GH1		CEACAM7	GAPDHS	FTO	GABBR2	GULP1	FMO5	CTAG2	DIRAS2	GDAP1	GJA5	HIRA	EPHX1	ID3	INSIG2	HAAO	GLT8D2	KCNC1	HSD17B13	KIAA1841	KLRG2			HDGFL1	HS3ST1			GSPT2	FOXF2	H2AC17	IL19	GPR68
DHRS7	RAB4A	HES1	GALE	L1CAM	KCNA1	PTPN1	GPR132	PSMB9	IFIH1	GEM	IRS1	HAL	HEG1	H3C3	IL1A	LRRC37A	GJB3		CFAP97	GBE1	GALC	GAL	HAUS3	GABBR2	CTSW	DLGAP2	GFRA1	GLRX	HSPA4L	ERO1A	IFFO1	JPT1	HEYL	GNAO1	KCNH3	HSPE1	KLF12	LAS1L			HDHD5	HTRA3			GSTM3	FOXG1	HAPLN1	IL1RL1	GUCA2A
ECH1	RPS6KA3	HR	GFUS	LCE2B	KCNC4	PTPN11	GPR183	PSME1	IFIT1	GFI1B	JUNB	HBD	HOXB2	HBP1	IL5	LRRC37A2	GPR15		CFI	GCK	GFRA1	GBP1	HERC6	GALNT12	CXCL14	DNAJA4	GHR	GM2A	HSPB8	ETV5	IFRD2	KCNE3	HLA-DMA	GPER1	KCNK3	HTT	KMT2D	LELP1			HES3	HYOU1			HAUS4	G0S2	HILPDA	IRS1	GUCY1A1
ELOVL5	RRP12	HSPB8	GINS2	LGALS4	KCNJ16	PTPN2	HAS2	PSME2	IFIT2	GLRA2	KANK3	HKDC1	HTR4	HDAC5	INHBB	MAGIX	GPR37L1		CHAC1	GCNT2	GOLGA8A	GBP2	HIRA	GAMT	CYP2C18	DNM3	GPATCH2	GNAI1	IAPP	F2RL1	IL13RA1	KCNK5	HLA-DPA1	H1-6	KCNQ1	IDH3A	KRT80	LHX6			HEY1	IGF2			HCFC1R1	GATA3	HS3ST1	ITGA5	GZMB
ENPEP	SAT1	IGF1R	GJB3	LUZP4	KCNQ4	REG1A	HBEGF	RIPK2	IFIT3	GNAT2	KCNJ2	HOXB8	IBSP	HHIPL2	INSR	MBTD1	GPR52		CHRDL2	GLRX	GPATCH1	GCLM	HS2ST1	GBF1	CYP2C19	DNMBP	GPC4	GNE	ID2	FADS2	IL17RC	KCNQ1	HLA-DPB1	HOXB2	KLF2	IDI1	KRTAP2-1	LINC00628			HLA-A	IL12B			HERC6	GJB1	HSD3B2	ITGB6	HCRT
ENTPD5	SCD	IGFBP4	GLA	MBNL2	KDM5D	SOCS1	HIF1A	RNF31	IFITM2	GOLPH3L	KCNJ9	HTR3B	IL18RAP	HKDC1	IQCG	MGAT5	GRID2		CIB4	GPC1	GPER1	GCNT1	HSPA13	GDF15	DBF4B	DOCK4	GPD2	GPR37	IFI27	FERMT2	IRS1	KLF6	HLA-DQB1	HOXC8	KRT15	IFI30	LINC00173	LINC00951			HLA-DMB	IL6			HNF1B	GNAL	HSF2	JADE3	HES1
EPHA2	SEC24D	IL17RB	GPER1	MC2R	KLF10	SOCS3	HPN	RSAD2	IFITM3	GPC4	KCTD12	HYAL3	IQCG	HNRNPA3P1	IRS1	MPDZ	GRM4		CKAP4	GPC3	GRB10	GJA1	HSPA4L	GDPD3	DDX51	DUSP4	GPER1	GRAMD2B	IFI35	FGB	IRS2	KRT23	HLA-DRA	HOXD1	KRT5	IFI35	LINC00293	LRRC61			HLA-DRB1	INHBB			HOXB13	GNG11	HSPG2	JAM2	HLA-DRA
EPHX1	SELENOP	IL6ST	HMGCS2	MECOM	KLF6	STAM2	HRH1	RTP4	IFNAR2	GPR35	KHDRBS3	IFNG	ITIH4	HOXA5	ITGA9	MROH7	GRM5		CNTNAP5	GPC4	GREB1	GK	HSPB8	GNAI2	DENND1C	DUSP6	GREB1	GRB10	IFI44	FGFR3	ISLR	LDHC	HLA-DRB1	HPR	L2HGDH	IFIT1	LINC00842	LYPD6			HOXB5	INSM1			ID1	GNG4	ID1	JMJD1C	HOXA3
ESR1	SGK1	INHBB	HOMER2	MMP16	KMO	STAT1	ICAM1	SAMD9	IL10RA	GPX2	KIF1C	IGLV2-14	KCNC3	HSF2BP	JUNB	MRPL20	GRTP1		CPLX1	GPI	GTF2I	GK3P	IAPP	GRAMD2B	DLK2	DYNC1I1	GTF2I	HACD1	IFI44L	FHL1	ITGBL1	LDLR	HLA-DRB4	HS3ST3B1	LIFR	IFIT2	LMNTD2-AS1	MBLAC2			HSD3B7	INSRR			ID3	GZMB	ID2	JMJD6	HS1BP3
ETFDH	SLC26A2	INPP5F	HPRT1	MST1R	KMT2D	STAT2	ICAM4	SAMD9L	IL15	GUCY1B2	KIF21B	IL12A	KIF21B	HTR2B	KCNA3	MTMR11	GZMH		CPLX2	GRHPR	GULP1	GLRX	ICE1	GUCY1A1	DLX6	EFCAB6	GULP1	HBEGF	IFI6	FLVCR2	ITIH5	LGMN	HMGCS1	HSPA12A	LTBP1	IGLL1	LMTK3	METTL1			IFIH1	IRX3			IL17RB	HAS2	IFIT1	JUN	ICOS
ETS2	SLC38A2	ISG20L2	HR	MUC4	LAMC2	STAT3	ICOSLG	SELL	IL15RA	H3C12	KRT13	IL19	KIR2DL5A	IL18	KCNE5	MTRF1L	H1-3		CPN1	GYS1	H1-2	GRAMD2B	ID2	GUCY1B1	DPT	EMP1	H4C8	HEG1	IFIH1	FOSL1	ITPKB	LRG1	HMGN5	HTN1	MAX	IL18RAP	LYPD3	MICU1			IGFBP6	ISLR			IL18	HBA2	IFIT2	JUNB	ID1
F10	SMS	ITPK1	HSPA4L	MYOC	LGMN	TGFB1	IFITM1	SLC25A28	IL18BP	HBP1	L1TD1	ITGA2	KLK11	IL25	KCNG1	MYBL1	H2BC3		CPXCR1	HAS1	H2AC11	HBEGF	IFI27	HEY1	DPYS	EN2	HSPB8	HERC5	IFIT1	GABBR2	KCNK3	LSS	HOXB1	HTR1B	MED12L	IL27RA	MAP3K6	MMP16			IL12RB1	KCNC3			IL20RA	HEY2	IFIT3	KANK1	ID4
F11	SORD	JAK2	HSPB8	MYOM1	LHCGR	TLR2	IFNAR1	SP110	IL2RB	HOXD13	LGALSL	ITGA6	KRT24	INHA	KCNK5	MYO15B	HCRTR1		CRTAP	HDLBP	H2AC6	HIVEP2	IFI44	HOXB7	DSG1	ERC2	ID1	HPGD	IFIT5	GAL	KCNN4	MAL2	HPCAL4	HTR2C	MESP2	INTS3	MCHR1	MMP25			IRF7	KCND3			IL33	HOXB2	IFT74	KCNN4	IFI30
FABP1	SPCS3	KAZN	ID2	MYOM2	LILRP2	TNF	IFNGR2	STAT2	IL4R	HTR2B	LIF	JCAD	KRT6B	ISL1	KCTD12	NAALAD2	HOXD1		CSTA	HEXA	H2AC8	HK2	IFI44L	HSD17B11	DSG3	ESM1	ID2	HSD17B11	IFITM1	GALNT12	KCTD12	MAN2B2	HS3ST1	IFNA17	METTL27	ISYNA1	MEG3	MNT			IRF9	KCNJ9			KCNQ1	HSPA1A	IGFBP1	KDM6B	IGLC2
FAH	SPDEF	KCNK15	IDH2	NECTIN1	LMO7	TNFRSF12A	IL10	TAP1	IL6	HYAL4	LILRB4	KCNC4	LAG3	JCAD	KIF13A	NEAT1	HOXD12		CXCL12	HK1	H2BC10	HOMER1	IFI6	HSPA2	DTNB	ETV1	IFT57	HSD3B1	IFT57	GCNT1	KLF2	METRNL	IFNA21	IFNA4	MFAP2	JPT1	MEGF6	MON1A			ISG15	KCNK4			KCNV1	IGFBP6	IL36G	KHDC1	IL11
FAS	SRF	KCNK5	IGFBP4	NEURL1	MAGEB4	TNFRSF1A	IL10RA	TDRD7	IL7	IGLV2-14	LIME1	KCNS1	LAMP3	JCHAIN	KIF1C	NEUROD2	HPR		CYCS	HK2	H2BC5	HSPA2	IFIH1	IL1R1	DTX2	ETV2	IGF1R	HSPA2	IGF1R	GDF15	KRT15	MFSD4A	IL17A	IFNA6	MIF4GD	KCNE3	MGARP	MPHOSPH10			KCNA2	KCNN1			KDM5D	IGFBP7	IRF1	KIR2DS2	IL26
FBLN1	SRP19	KDM4B	IGSF1	NFE2	MAK	TNFRSF1B	IL12B	TENT5A	IRF1	IL22RA1	LLGL2	KDR	LEFTY1	KANSL1L	KIF21B	NOL12	HRH3		CYLC2	HMOX1	H2BC6	ICAM1	IFIT1	ITGB4	EDAR	ETV4	IGFBP2	IMPA2	INPP4B	GNE	KRT5	MGARP	IL18RAP	IL33	MLLT1	KCNK4	MICAL1	MRTO4			KCNA3	KDELR2			KIAA0319L	IL11	IRF5	KLF10	IL7R
FBP1	STEAP4	KLF10	IL17RB	NNAT	MC3R	TNFRSF21	IL15	TMEM140	IRF2	IL4	LRP8	KLHDC8A	LIF	KCNS1	KIR2DL5A	NOTCH2NLA	HSPA12A		CYP4F11	HOXB9	H2BC7	IDO1	IFIT5	ITGB6	EDIL3	ETV5	IGFBP4	ITGA6	INPP5F	GOLM1	LIMD1	MICU1	IL19	INHBB	MMAA	KIF9	MIGA2	MTERF3			KCNA4	KIFC1			KIT	INHBE	IRX5	KLF4	INSM1
FETUB	STK39	KLF4	IL6ST	NPL	MEP1B	TYK2	IL15RA	TRAFD1	IRF4	IRAG2	LSP1	KRT32	LILRB4	KDM5D	KLF6	NPIPB4	IL17A		CYP4F12	HS3ST1	H2BC8	IFIT3	IFT57	KCNMA1	EDN1	EVI2A	IGFBP5	ITGB6	INSIG2	GPX2	LPL	MMP15	IL1RL1	INSL4	MOXD1	KRBA1	MISP	MTFP1			KCND1	KLRC1			KLRC3	ISYNA1	ISL1	KLF7	IPO8
FMO1	TMEM50A	KLK10	IMPA2	NPY4R	MS4A3		IL18	TRIM14	IRF5	JCAD	LTC4S	KRT85	LIM2	KIAA0319L	KLRK1	NSMCE2	IL24		CYP4F2	HSPA5	H2BC9	IGF2BP2	IGF1R	KCNN4	EDN2	EXOC6B	IL24	JAM2	IRF7	GPX3	LTC4S	MPZL2	INPP4B	IRF9	MYC	LDHC	MMP1	NDUFAF4			KDM5A	KLRD1			KLRF1	KCNG1	JADE2	LARP6	ITGA7
FMO3	TMPRSS2	KRT13	ISG20	NRXN3	MTMR11		IL18R1	TRIM21	IRF7	KCNC4	LYL1	LAD1	LINC01711	KLHDC8A	LGALSL	NSUN6	ILVBL		CYP4F24P	IDS	H2BS1	IL15RA	INPP5F	KIAA0513	ENPP1	FABP3	INPP4B	KAT2B	IRF9	GRAMD2B	MATN2	MSMO1	ITIH3	ITGB2	MYCN	LDLR	MMP3	NEFH			KITLG	KRT27			KRT20	KCNJ12	KIF18A	LEMD3	ITGA9
G6PC	TNFAIP8	KRT15	ITPK1	OR10H1	MYBPC3		IL18RAP	TRIM25	IRF8	KCND1	MAF	LATS1	LYL1	LINC00472	LIF	OXNAD1	IMPG2		CYP4F3	IER3	H3C10	IL1R1	IRF7	KMO	EPHB3	FAM155B	INPP5F	KCNN4	ISG15	GUCY1B1	MEPE	MYO5B	KCNIP1	JAG1	MYH11	LGALS3	MMP9	NFIA-AS1			KRTAP3-1	KRT86			LGR5	KCNN4	KITLG	LIF	KCNA1
GABARAPL1	TPD52	KRT18	JAK1	OXT	NFIC		IL1A	TRIM26	IRF9	KCNIP2	MAFF	LCN2	MAFK	LINC00928	LILRB4	OXTR	INA		CYP4F8	IGFBP1	H4C8	IL4R	IRS1	KRT7	EPHB6	FAM174B	IRS1	KCTD12	ITPRID2	IGF2BP2	MERTK	NEU1	KCNJ10	JAM3	MYOC	LIPG	MN1	NIP7			LAMA1	KRTAP8-1			LIMCH1	KCTD12	LGR4	LIPG	KCNA5
GAD1	TSC22D1	KRT19	JAK2	P2RY6	NLK		IL1B	TRIM5	ISG15	KCNQ1	MAFK	LDOC1	MARCHF2	LINC01558	LMO3	PCDHB13	JAM2		CYP8B1	IGFBP3	HEBP1	IMPA1	ITPRID2	KRT81	EPHX2	FEZF2	IRX5	KHDRBS3	JAK2	IL4R	MMAA	NFIL3	KCNJ4	KALRN	NCAM1	LSS	MST1L	NLE1			LBP	LANCL2			MANBA	KRT13	MAP3K19	LMCD1	KCNE1
GART	UAP1	KRT8	KCNK5	PC	NOL4		IL1R1	TXNIP	ISG20	KCNS1	MED26	LMOD1	MC3R	LIPF	LRP8	PEX3	KCNIP4		DBF4	IL6	HERC6	INHBA	JAK2	LAMB2	FAM215A	FGF9	JAK2	KLF6	JMJD1C	INAVA	MOCOS	NIBAN1	KCNMB3	KANK3	NCF4	LTV1	MTMR11	NOC4L			LGALS3BP	LCAT			MANEA	KRT23	MAPKBP1	LRP12	KCNN1
GCH1	UBE2I	LAD1	KIF20A	PKLR	NOVA1		IL2RB	UBA7	ISOC1	KIZ	MFSD12	LPA	MFSD12	LRP2BP	LRRC6	PGAP1	KIR2DS2		DBF4B	ILVBL	HIRA	IQCG	KANK1	LIMCH1	FCGBP	FLT4	JMJD1C	KLHL7	KCTD3	ITGB4	MRPS6	NKAIN1	KIAA0087	KCNH7	NELL2	LYPD8	NBEAL1	NOL6			LHB	LCN2			MANSC1	KRT5	MINPP1	LTBP2	KLF15
GCKR	UBE2J1	LRIG1	KLF4	PLA2G10	NTS		IL4R	UBE2L6	ITGB7	KLHL35	MPP6	LRCH1	MMP25	LRRC37A	MAFF	PHC3	KISS1		DDC	INHA	HSPA4L	IRF1	KCTD3	LMO3	FETUB	FMNL2	KDM6A	L1CAM	KIF5C	KCNN4	MSL2	P2RX5	KLHL28	KCNQ4	NFIL3	MAK	NGFR	NOP14			LHX1	LRG1			MARCHF2	KRT76	MIR22HG	LYPD1	KLF2
GCLC	VAPA	MAPT	KLK10	PRRG2	P2RY10		IL6	USP18	JAK2	KRT2	NEUROD4	LRP2BP	MPZ	MAB21L2	MAGIX	PLGLA	KITLG		DDX43	IRS2	IAPP	ISG20	KIF5C	LOXL1	FGF4	FNDC8	KITLG	LAIR2	LIN7C	KLF4	MSRB2	PACSIN3	KLRD1	KIR2DL4	NFXL1	MBL1P	NID2	NR2C2AP			LSR	LTA			MDFIC	KRT81	MITF	MAFB	KLHL12
GCNT2	XRCC5	MAST4	KLK11	PRSS8	P2RY11		IL7R	WARS1	KLRK1	LGALS4	NOP2	LRP3	MUC1	MACROH2A2	MEGF6	PNISR	KLF13		DEFB1	ISG20	ID1	ITGA2	KLF10	LRP5	FGFR3	FOXG1	KYNU	LAMC1	LPGAT1	KRT7	MYOC	PAK1	KRT14	KLK8	NGFR	MCM5	NR6A1	OAF			MAK16	LTB4R			MEF2C	L1CAM	MLYCD	MAP3K4	KRT9
GNMT	XRCC6	MED13L	KRT13	PSCA	PAFAH1B2		INHBA		LAP3	LGR4	NOX4	LRP5L	MVD	MAGI2	MFSD12	POLR2J4	KRT23		DEFB119	JMJD6	ID2	ITGA3	KRR1	MALL	FGGY	G0S2	LIN7C	LRP5	LRIG1	KRT81	NAT8	PARM1	KRT23	KLRC4	NR1D1	MCM6	NRP1	OR10H1			MAP3K2	LYPD8			MFGE8	LCK	MN1	MAS1	LGALS4
GSR	ZBTB10	MED24	KRT19	PSD	PDE5A		IRAK2		LATS2	LINC01558	NR2F2	MAB21L1	MYH15	MAP2K6	MPP6	PVT1	KRT85		DGKG	JUN	IFI27	ITGB6	LAMB1	MAOA	FMO6P	GABRA1	LPGAT1	MALT1	LSM7	L1CAM	NCAM1	PDGFD	KRT81	LAMC3	NR1D2	MGARP	NTF4	OR7C1			MAPK7	MAPK8IP1			MLLT3	LGALS1	MPPED2	MATN1	LHX6
GSS	ZMIZ1	MICB	LAMC2	PTN	PDK1		IRF1		LCP2	LIPF	NUDT13	MEOX2	MYH4	MEOX1	NCS1	RAX	KRTAP5-9		DHFR	KDELR3	IFI44	JUNB	LIN7C	MAPRE3	FOLR2	GABRA3	LRIG1	MAP3K5	LTN1	LAMC1	NID1	PDK1	LCP1	LGALS13	NTHL1	MRTFB	NYNRIN	P2RX5			MEP1A	MAPKBP1			MOCOS	LMO2	MRM1	MED18	LINC01140
GSTA3		MINDY1	LARGE1	PTPN7	PEX6		IRF7		LGALS3BP	LRP2BP	OR7C1	MIR600HG	MYOZ1	METTL7A	NR2F2	REPS1	L1TD1		DIPK1A	KDM3A	IFI44L	KCNS3	LPGAT1	METRN	FOXI1	GALR2	MAFB	MAPRE2	MAFB	LGALSL	NR1D1	PDK3	LILRA6	LHX2	OLFML3	MS4A7	OR2A7	P3H4			MET	MAPRE2			MRNIP	LOXL1	MRPS6	MISP	LMTK2
GSTM4		MLPH	LLGL2	RAB30	PGGT1B		ITGA5		LY6E	LRRC37A	OR7E47P	MISP	MYOZ3	MISP	OR10J1	RFX3	LAMA1		DMD	KIF5A	IFI6	KLF4	LRIG1	MGAT4A	FRAS1	GBA3	MDK	ME2	MARF1	LHFPL6	NT5DC3	PDZD11	LIN7A	LRCH1	OSGIN1	MSMO1	OSBP2	PCDHB18P			MMP3	MAST2			MST1L	LPL	MUSK	MLXIP	LPAR6
GSTO1		MPPED2	LSR	RAMP1	PIP		ITGB3		LYSMD2	LYVE1	OSM	MPDZ	NDRG4	MMP7	OR6A2	RUFY2	LARGE1		DNAH8	KLF6	IGF1R	KRT7	LTN1	MIA3	GADD45G	GFAP	MED13L	MICAL2	METTL3	LIMCH1	OGN	PFKP	LINC-PINT	LRRC19	OSMR	MSX2	PAK3	PCOLCE2			MRAP	MAZ			MTARC1	LTBP2	MYBL1	MMD	LRP4
GSTT2		MREG	LTF	RASA3	PNLIPRP1		ITGB8		MARCHF1	MAP2K6	PAK6	MTNR1A	NKG7	MOGAT2	OR7E47P	SCAF4	LBX1		DPPA2	KLF7	INPP5F	KRT81	MAD2L1	MPI	GBP1	GFI1	MEGF9	MICU1	MGP	LOXL1	PADI3	PLAGL1	LUM	LYPD1	P3H4	MTHFD1	PBX3	PCOTH			MYOG	MC1R			MVP	MAOA	NPAS1	MPZL2	LY6G6C
HACL1		MSMB	MAPK13	RBBP9	PODXL2		KCNA3		METTL7B	MEOX1	PAX1	MYLK	NKX2-8	MTARC1	OSM	SCG5	LILRB5		DRD5	KLHL24	IRS1	KTN1	MAP4K3	MPZL2	GKN1	GLDC	MGP	MORC4	MINPP1	LRP5	PAQR7	PLAT	MAGEC2	MACROH2A2	PALD1	MYO7B	PBX4	PES1			NAGK	MFAP2			MXD3	MAOB	NPEPPS	MRTFA	LY6G6E
HES6		MUC1	MAPT	RBMXL2	PPAN		KCNJ2		MT2A	MFSD13A	PDE4A	NACAD	NMBR	MTARC2	PAK6	SEC31B	LRIG1		DUSP13	LALBA	ITPRID2	LHFPL2	MARCHF7	MSX2	GNRH2	GLRX	MICB	MPZL2	MOCOS	LRP8	PDE4B	PLK2	MAMLD1	MAL	PDE10A	NABP1	PC	PIGW			NCOA2	MKLN1			MYRIP	MAP1B	NR2F2	MTRF1	LZTFL1
HGFAC		MYB	MDK	RBP1	PPP1R15A		KCNMB2		MTHFD2	MISP	PER2	NAT8B	NOS2	MYCT1	PDE4A	SGCE	LRRC6		ECM2	LARGE1	KIF11	LIF	MATN2	MUC1	GP2	GNG11	MINPP1	MSX2	MOCS2	MALL	PDE9A	PLSCR1	MATN3	MAP3K5	PDE4B	NEIL3	PCDHB4	PIM2			NEO1	MST1R			NLRP2	MFAP2	NRSN2	MYBPC2	MAGEC3
HMOX1		MYBBP1A	MEST	RFX2	PRDM11		KIF1B		MVP	MMP19	PIM1	NDP	NR1H3	MYLK	PIM1	SIGLEC15	MAGEA8		ECPAS	LDHA	KIF5C	LOXL2	MBNL2	MVD	GPR173	GPR18	MPDZ	MTMR11	MPDZ	MAOA	PDGFRA	POLE3	MC4R	MEFV	PDE6G	NIPSNAP3A	PDK2	PLA2G4A			NFATC2	MTF1			NME3	MIA	NUDT18	NCOR2	MAPK13
HNF4A		MYBL1	METTL3	RHOH	PRKG1		KLF6		MX1	MTARC1	PIM2	NEFL	NUDT11	NACAD	PIM2	SLC15A2	MATN4		EFCAB11	LDHC	KRIT1	LPAR6	MED17	MXRA7	GPR52	GPR19	MSMB	MTMR2	MSMB	MAP3K9	PDIA5	PON2	MINAR1	MIA	PDE6H	NKAIN1	PDZD2	PLD6			NGEF	MYO5B			NSUN6	MICU1	NUDT6	NDST1	MMP25
HPRT1		MYC	MICB	SEMA3A	PTGS2		LAMP3		MX2	MTARC2	PLAC4	NPY5R	OLFM1	NAP1L2	PIP	SLC25A16	MC5R		EFCAB14	LOX	LLGL2	LPIN1	MGP	MYO1D	GRM2	GPR37	MXI1	MYCL	MTCL1	MEF2C	PDLIM3	PPP1R3F	MLANA	MMRN2	PDE9A	NQO2	PJA2	PMM2			NGF	MYOM1			NUDT18	MLN	NUFIP1	NFATC4	MRM1
HRG		MYOF	MOCS2	SERPIND1	RIPK1		LCK		MYD88	MYH7B	PLEC	NRXN1	OPRL1	NDOR1	PLEC	SLC27A3	MEOX1		EIF1AX	LXN	LTBP1	LPP	MPDZ	NDRG1	H3C1	GPR4	MYB	NAV2	MTIF2	MICAL2	PDLIM4	PREP	MRPL41	MSC	PDGFA	NSDHL	PLAT	POLR1E			NMT2	MYRF			NUDT6	MPP6	OR7A17	NGF	MYCN
HSD11B1		NADSYN1	MYB	SEZ6L	RNF25		LCP2		NAMPT	MYLK	PLXNA3	NTF3	OR6A2	NKX3-2	PLPP2	SLC35E1	METRN		EIF2S2	MAFF	LTN1	LRP8	MRPL19	NIBAN1	HAAO	GRIN2A	MYBL1	NDC80	MYB	MPZL2	PDZRN3	PRKCH	MSX2	MSMB	PDIA5	NTSR1	PLEKHA2	PPRC1			NSMF	NBL1			OAS1	MSN	OSR2	NTF3	MYO1A
HSD17B2		NAV2	MYOF	SIGLEC5	RNF39		LDLR		NCOA3	NKX2-5	PMM2	NUDT7	OXNAD1	NR1I2	PLXNA3	SLC4A5	MYH13		ELAPOR1	MAP3K1	MAFB	MALL	MSH2	NME4	HLA-DOA	GRM1	MYLK	NEDD4	MYBL1	MXRA7	PHF1	PRSS37	MTUS2	MTARC2	PDLIM3	OAS2	PLEKHG2	PRAP1			NT5DC2	NEUROD2			OAS3	MYL9	OTUB2	OVOL2	MYO1D
ID2		NBL1	NAB2	SLC12A5	RREB1		LIF		NFKB1	NPY5R	PNMT	OR1A1	P2RY14	NUAK1	PMM2	SNHG3	MYO1A		ELAVL1	MIF	MARF1	MAOA	MSMB	NNT	HOXB8	H2BC17	MYO10	NFE2L3	MYC	MYO1D	PI16	PSCA	NDST3	MX2	PHAX	PAFAH2	PLK1	PRELID3A			OAS1	NF1			OLR1	NELL2	PAQR5	PAIP2B	MYO1E
IDH1		NCOR2	NBL1	SLC22A18AS	SAMSN1		LPAR1		NFKBIA	OR2F2	PNO1	OR1F1	P3H3	NXF2	POLR3G	SNRPN	NACA2		EMP2	MT1E	MATN2	MAP2K4	MTCL1	NOTCH3	HOXC8	H2BC3	MYO1B	NMI	MYLK	MYO5A	PKP1	PTPN14	NEB	MYBPC1	PHC1	PCDHB5	PLK5	PRMT3			OCLN	NLRX1			OPN3	NES	PCBP3	PDGFA	MYO7B
IGF1		NPY1R	NCOR2	SLC9A5	SCG5		LTA		NLRC5	OR7A17	POLR3G	OR2F2	PAIP2B	ODAM	PPP4R4	SOCS7	NAV2		ENTPD6	MT2A	MDK	MAP3K5	MTERF3	NPC2	HRH3	HAS2	NEDD4L	NMT2	NDUFAF1	NEDD9	PLA2G4A	PTPRJ	NMRK2	MYO15A	PHF1	PCNA	PODN	PRR3			OLFM1	NPY4R			OSGEPL1	NMNAT2	PEX11B	PDGFB	NID1
IGFBP1		NRIP1	NMU	SPINK2	SIRPB1		LY6E		NMI	OSR2	PPP4R3B	OSGIN1	PAQR6	P2RY4	PRAF2	SPIB	NDST3		EPHX1	MXI1	METTL3	MBNL2	MTIF2	OPN3	HSPB8	HBEGF	NPY1R	NMU	NGLY1	NME4	PLEK2	PTRH1	NOL10	MYOT	PHIP	PCYT2	POGZ	PRR7			PCDH7	NTSR1			PAK1	NR3C1	PEX12	PDLIM4	NOTCH3
IGFBP4		NXT1	NPY1R	SPRY4	SIRT4		LYN		NOD1	PARP11	PRM1	PACRG	PAX1	PAK3	PRKCD	SRA1	NEK11		ESCO2	MYH9	MEX3D	MEIS3P1	MYB	P4HA2	HTR1B	HEY1	OSR2	NPC2	NMRK1	NPC2	PLPP3	PYGL	NPPB	NAP1L3	PI16	PDK1	PPARD	PUS1			PCDHA10	OLR1			PAPSS2	NRIP1	PGBD5	PFKFB3	NSUN6
IL1R1		OLFM1	NRIP1	SRPX2	SLC27A6		MARCO		NUP93	PBXIP1	PRSS2	PARM1	PCDHA5	PBX1	PRR7	STAG3L1	NELL2		ESR2	NAGK	MFF	MGAT4A	MYBL1	PACS1	HTR1D	HPN	OSTM1	NPL	NOL8	NT5C2	PLTP	RASSF1	NR3C2	NEUROG1	PLEKHA5	PFKP	PPM1N	PUS3			PCP2	OXT			PCP4	NRIP3	PIK3R3	PHLDB1	OGDH
IRF8		OLFML3	NXT1	SSX1	SLC6A14		MEFV		OAS2	PCDHB3	PSG4	PCDH9	PCDHB1	PBXIP1	PRSS50	SUZ12P1	NPC1L1		ETNPPL	NCAN	MICB	MGLL	MYC	PACSIN3	HYAL4	HS3ST3B1	PALLD	NR4A3	NPEPPS	NT5DC2	PM20D1	RHOV	NRN1	NFASC	PLTP	PLAT	PRRT2	PUS7			PHOSPHO2	P2RY2			PDGFC	NTSR1	PLA2G12A	PIK3CD	OPRPN
ITIH1		OPN3	OLFM1	STAG3	SLC7A1		MEP1A		OAS3	PDCD4	PTCH1	PCDHB3	PCDHB13	PCSK5	PTCH1	TAF9B	NPHS2		F2RL2	NDRG1	MOCOS	MIR22HG	NAA15	PAPSS2	IFI44L	HSD11B1	PCGF3	NTAN1	NPY1R	NUMB	PNLIPRP1	RIMKLB	OLFM1	NGB	POLR2M	PPAN	PRSS33	PUS7L			PIGN	PDC			PDGFRL	OBSL1	PLEKHF1	PKIA	OR2H1
ITIH4		OVOL2	OPN3	TACR3	SNAI1		MET		OASL	PGLYRP4	PTGER3	PCOTH	PCSK7	PDCD4	PTH1R	TCL1B	OR1A1		F5	NDST1	MPDZ	MMP1	NCAPG	PARM1	IFNA16	HTR7	PCSK6	NUAK1	NREP	OPN3	POLD2	RIPK3	OPRM1	NR2F1	PPP1R14A	PRAF2	PSMC3IP	QSOX2			PIM2	PDYN			PDZK1IP1	PARVB	PLXNA2	PLEKHA1	ORAI2
JUP		P2RY2	OVOL2	TACSTD2	SNAPC1		MMP14		OGFR	PIK3IP1	PTH1R	PCP4	PIM1	PDE1C	PTPN7	TDRD12	OR51E2		FAM167B	NDST2	MSMB	MMP10	NMRK1	PCDH1	IFNA17	IDI2-AS1	PDCD4	OPN3	NRIP1	OTULINL	POLI	ROPN1L	P2RY14	NREP	PPP1R3C	PREP	PTK2B	QTRT1			PLA2G10	PKIB			PF4	PAX6	POLL	PMEPA1	ORM1
KARS1		PAPSS2	PAPSS2	TAF13	SRCAP		MSR1		P2RY14	PLCL1	PTPN7	PDE1C	PIM2	PDE6B	PUS1	TENT2	PAGE1		FAM86DP	NEDD4L	MYB	MPZL2	NOC3L	PCDH8	IFNA5	IFNA8	PDGFRL	OPTN	OAS1	PACS1	PPP1R3C	RUNDC3A	PAH	NTNG1	PRDM4	PRKCA	PTPRE	REPIN1			PLA2G1B	PKLR			PIAS3	PCSK1N	PPP1R3D	PMP22	PBOV1
KYNU		PDLIM3	PCP4	TBX5	TANK		MXD1		PARP12	PNRC1	PUS1	PDE3A	PLA2G7	PIK3R3	PUS7	TLE4	PCDHA9		FASLG	NFIL3	NCAPG2	NFIL3	NOL8	PCOTH	IGF2-AS	IGF2	PDK3	OSBPL1A	OAS2	PACSIN3	PROM1	S100A14	PDC	NYNRIN	PRSS23	PSAT1	RAB4B	RPP40			PLXNA1	PLA2G6			PITX2	PCSK5	PRR15L	PPARD	PGLYRP1
LCAT		PDZK1	PDCD4	TEF	TEX14		MYC		PARP14	POU1F1	PUS7	PDE6B	PLPP2	PLA2G4C	PYCR3	TMEM163	PCDHB12		FAT3	NOCT	NDC1	NFKB2	NPEPPS	PCSK1N	IGLV2-14	IL13RA2	PDZK1	P3H2	OAS3	PARM1	PTGIS	SAA1	PIK3C2G	OR1A2	PTGER4	PTPN14	RAP1A	RPTOR			PPP1R1A	PLAC9			PLAC8	PDGFA	PRX	PPP1R13L	PHKG1
LEAP2		PEX11A	PDLIM3	TFDP3	THBD		NAMPT		PDE4B	PRDM11	PYCR3	PDHA2	POU4F2	PLCD1	RAB11FIP1	TMEM212	PCDHGA9		FECH	NR3C1	NDUFA5	NT5C2	NPY1R	PDE4B	IL19	IL1R2	PGR	PARVA	OASL	PCDH1	PUS7	SAA2	PNMA3	OSGIN1	PTGIS	PYGL	REC8	RPUSD4			PRH1	PMF1			PLLP	PDLIM4	PSG2	PPP2R2B	PKD2L1
LONP1		PGR	PDZK1	TFEC	TLX1		NDP		PELI1	PRDM14	RAB11FIP1	PHKG1	PRR4	PLCH1	RAC3	TMEM245	PDE10A		FERMT1	P4HA1	NET1	P2RY6	NRCAM	PDE4D	IL5	IL1RL1	PKP4	PDE4D	OXSM	PCDH9	RAMP1	SAA4	PON3	P2RX6	PTPRS	RANBP9	RHBDL2	RRP12			PTGS2	POLD2			PLOD2	PDZD2	PTCH1	PRG2	PLAT
LPIN2		PLAAT3	PERP	TFF1	TNC		NFKB1		PFKP	PRKG1	RAB40A	PLCB4	PRSS2	PLCL1	REST	TNRC18	PDZRN4		FGA	P4HA2	NME3	PAPSS2	NRIP1	PGPEP1	IMPA2	IL36A	PLCB1	PEG10	PCP4	PDK4	RCE1	SEC14L2	PRKX	PAGE4	QPRT	RCOR2	RNASE4	RRP15			PTPN22	POSTN			PLSCR4	PELI2	PTGER4	PVRIG	POF1B
MAN1A1		PMAIP1	PGR	TMEM176A	TNFRSF9		NFKBIA		PIM1	PROM1	REEP2	PLEK	PRSS50	PLEK	RGCC	TRIM36	PHF14		FGF7	PAM	NMU	PCDH9	OAS1	PLEKHB1	IVL	INHBA	PLCB4	PER3	PDCD4	PDLIM7	RECK	SECTM1	PROX1	PAX3	RASD1	RD3	RNF152	RRP9			PXMP2	POU1F1			PROS1	PHLDA3	PTX3	PXDC1	PPARGC1A
MAOA		PODXL	PKP3	TNFRSF8	TPMT		NLRP3		PLA2G4A	PRSS16	REST	PLPPR4	PTH1R	PNRC1	RGS16	TRIM52	PIPOX		FGF7P2	PCK1	NPY1R	PDE4B	OAS2	PLPP1	KCNE1	ITGA2	PLK2	PGM1	PDZK1	PEG10	RMND1	SEPTIN9	PRSS2	PCDHA5	RBP1	RETREG3	RNF19A	S100A10			RAI2	PPP1R3C			PRR15L	PLEKHF1	RAB11FIP2	RAPGEF2	PPFIA4
MARCHF6		PPIF	PLAAT3	TNNI3	TREX1		NMI		PLSCR1	PTGDS	RGCC	PNMA3	PTPRN	POU2AF1	RGS3	TXLNGY	PLSCR2		FGG	PDGFB	NREP	PDLIM7	PAK1IP1	PLPP2	KCNMB1	ITGB2	PLS1	PHYH	PGR	PKIA	RNF25	SFTPD	PRSS3	PCDHB12	RCE1	RGS11	RUSC1-AS1	SAC3D1			RAMP3	PPT1			PRSS1	PLEKHO1	RAB33A	RCOR1	PPIEL
MBL2		PRSS23	PLAC1	TPTE	TRIM38		NMUR1		PML	RAB6B	RGS16	POU1F1	PTPRO	PPP2R5C	RHBDF2	UCP1	PRDM12		FGL1	PDK1	NRIP1	PGM3	PDZK1	PNRC1	KCNMB2	ITGBL1	PMAIP1	PKD2	PLBD1	PLAU	RORC	SGPL1	PRTN3	PDZK1	RFTN2	RIOX2	S100A8	SCFD2			RASD1	PRL			PRSS8	PLTP	RAB38	RGCC	PSPN
MCCC2		PTGES	PLK4	TRAF1	ULBP2		NOD2		PNP	RASL12	RGS3	POU5F1P4	PTX3	PRKG1	RHOB	VEZT	PRLH		FLT1	PDK3	NUP205	PHLDA1	PEG10	PPP1R3C	KCNQ3	ITPKA	PMP22	PLS3	PMS1	PLPP1	RPAP3	SGSM3	PSMB9	PFKFB4	RNF41	RRM2	S100A9	SHISA9			RSPH1	PRSS1			PTPN13	PMEPA1	RAI2	RGS11	PTCRA
MPP2		RAB17	PLXNB1	TXNRD2	USP9Y		NPFFR2		PNPT1	RETN	RHOB	PPP1R3A	PUS7L	PROM1	RNF144A	VPS53	PSG2		FNDC9	PFKFB3	OSR2	PIGA	PLA2G12A	PRPS1	KIAA0087	KCNA5	PPM1E	PPARG	POLI	POR	RPS6KB2	SH3BGRL2	PTEN	PGR	RRM2B	S100A14	SAMD9	SIX3			SDSL	PRSS29P			RAB25	PRF1	RASGRF1	RGS12	RAB3IL1
MT2A		RAB31	PPIF	UTS2	VDR		OLR1		PSMA2	RHOBTB1	RNF144A	PRB3	PYGM	PRSS16	RNF20	ZBTB44	PTN		FTH1	PFKL	OVOL2	PLAC1	PLK4	PTGER4	KIF25	KCNAB3	PPP1R3C	PRKCH	POT1	PPARG	RTKN	SLC2A1	PTENP1	PLCE1	S1PR3	SC5D	SDR16C5	SLC19A1			SEPTIN6	PTPRO			RAB26	PRKAA2	RASL10A	RHOB	RAMP2
MTHFD1		RAPGEFL1	PRKAR2B	VEGFC	VEGFA		OPRK1		PSMA3	RIN2	RPL10P17	PRKG1	RDH5	RABEP2	RPA4	ZBTB6	PTPRO		FTH1P16	PFKP	PCMTD2	PLAGL1	PMAIP1	PTMS	KLF3	KCNC1	PTBP2	PRPS1	PRELID3B	PPP1R13B	RXRB	SLC6A14	PTPRCAP	PLPPR4	SASH1	SCGB3A2	SERPINB1	SLC25A15			SERGEF	RAD9A			RAB27B	PRPH	RBM47	RNASE4	RASSF8
NDRG2		RARA	PRLR	WNT2	VEGFB		OSM		PSMB10	RLN2	RPP25	PRKG2	RGCC	RASGRP3	RPP25	ZNF160	PTTG2		FTH1P20	PGAM2	PCYOX1	PMAIP1	POLI	PTOV1	KLF8	KCNH2	PXDN	PSMB10	PRKAR2B	PRKCH	S1PR3	SLC6A6	PYCARD	PRDM14	SCARA3	SEPTIN9	SKIL	SLC25A22			SH2D2A	RASGRP2			RABL6	PRPS1	RDH16	RNF126P1	RCBTB2
NFS1		RASGRP1	PRSS23	XPNPEP2	WASL		OSMR		PSMB2	RNASE2	S100A1	PROX1	ROR2	RASL12	RSPH6A	ZNF221	PXDC1		FTH1P3	PGF	PDCD4	PSMB10	PRELID3B	PTPRE	KLK12	KCNJ13	RASGRP1	PSMB9	PRMT3	PTGER4	SASH1	SNHG11	RARRES1	PRG3	SERPIND1	SERPINB5	SLC6A1	SLC25A25-AS1			SINHCAF	RBPMS			RAC2	PTGDS	RGL1	RNF19B	RHO
NINJ1		RBBP8	PTGER3		WRNIP1		P2RX4		PSMB8	RPL3L	SH2D4A	PRR5L	RPP25	REC114	SH2D4A	ZNF280D	RAB17		FTHL17	PGK1	PDLIM3	PSMB9	PRKAR2B	PTPRU	KLK7	KCNJ8	RHOBTB3	PTER	PRPF38B	PTK7	SATB1	SOCS6	RBIS	PRKAR2B	SH2D1B	SIGLEC1	SLC6A14	SLC25A26			SLC1A6	REG1A			RBM47	PTPRN2	RGS2	RRAD	RPL39L
NMT1		REEP1	PTGES		XCL1		P2RX7		PSMB9	S100A3	SHROOM2	PRSS16	RSAD2	RGS2	SIGLEC9	ZNF44	RALYL		FTL	PGM1	PDZK1	PTPRE	PRMT3	RAB5C	KRT1	KCNK10	RND3	PTGER4	PSPH	PTMS	SCARA3	SPECC1	RFPL1S	PRKN	SH3BGR	SLC22A7	SLITRK6	SLC27A2			SLC22A18	RETNLB			RBP4	RAI2	RIMS2	RUSC2	SAMD4B
NPC1		RET	PTPN6		ZFP36		P2RY2		PSME1	SCN3A	SLAMF1	PTGDS	S100A1	RHOBTB1	SLAMF1	ZNF529	RANGAP1		FTLP2	PGM2	PEG10	RAB27A	PSPH	RFTN1	KRT13	KCNK3	ROBO1	PTMS	PTBP2	PTOV1	SCARA5	SPHK1	RFTN1	PRR16	SIX5	SLC2A1	SMURF1	SLC29A4			SPRR2B	RNF112			RETREG1	RAMP2	RNF43	S100A3	SCNN1A
NQO1		RETREG1	RAB31		ZFP36L1		PCDH7		PSME2	SEC14L2	SLAMF7	RALGPS2	SCN8A	RIN2	SLC1A5	ZNF550	RBP3		FUT1	PHKG1	PGR	RCAN1	PTBP2	RPRM	KRT16	KCNK7	RRN3	PXDC1	PTER	PTPRE	SCCPDH	SPRR1A	RLN2	PRSS50	SLC12A4	SLC41A3	SPNS3	SLC6A15			ST3GAL2	RPAP3			RHOBTB2	RBP1	RPP25	SCHIP1	SELE
PAPSS2		RHOBTB3	RABEP1		ZFP37		PDE4B		PTGS2	SELP	SLC1A5	RAMP3	SCN9A	RNASE2	SLC29A2	ZNF551	RBP4		FXYD7	PIM1	PHF20	RGS16	PUS1	RRAGD	KRT17	KIAA1549L	S100A14	PYGL	QPRT	PTPRU	SERPINF2	SPRR2A	RSPH14	PSPH	SLC25A28	SMTNL1	SPOCD1	SMYD5			ST6GALNAC6	RSPO1			RNF144A	RGCC	SAP30	SEC14L2	SEMG2
PC		RHOD	RAPGEFL1		ZNF165		PDPN		PTPN1	SEMA6D	SLC29A2	RHOD	SCNN1A	RORB	SLC2A3	ZNF721	RBPJL		FZD7	PKLR	POLI	RHOQ	RAB31	S100A6	KRT31	KIF5A	SATB2	QPCT	RAB29	RAB5C	SFRP2	ST6GALNAC6	SCN10A	PTPRJ	SLC2A4	SP100	SPRR1B	SORD			STC1	SAA3P			RRAGB	ROR2	SAV1	SGK1	SERPINE1
PDK4		RPS6KA2	RBBP8		ZNF222		PIK3R5		PTPN2	SEPTIN10	SLC66A1	RIN2	SEMA7A	RPL3L	SLC34A1		SEMA5A		G6PD	PKP1	POT1	RND1	RAD51AP1	S100P	KRT38	KIF5C	SCUBE2	RASL11B	RALGAPA1	RAB8B	SH3BGR	SUCO	SELL	PTPRZ1	SLC33A1	SPRR1A	SPTB	SPATC1L			STK11IP	SDC4			S100A14	RPP25	SCGB1D2	SHCBP1L	SH3TC1
PDLIM5		RRP12	RET		ZNF286A		PLAUR		PTPN6	SERPINA5	SLC7A5	SCAND2P	SERPINC1	SARNP	SLC66A1		SERPINB3		GAS2	PLAC8	PRKACB	RNF19A	RAD54B	SAT1	KRT4	KIT	SDC2	RCAN1	RASGRP1	RAI14	SIRT3	SYT17	SEMA4D	RARB	SLC39A13	SQLE	SRGAP2B	SPPL2C			SYNGR4	SEMA5B			SAMD9	RRAGD	SEPTIN4	SKAP1	SHC2
PEMT		SCARB1	RNASEH2A		ZNF324		PROK2		RAPGEF6	SESN1	SLCO1A2	SCN7A	SLC12A8	SCGB2A2	SLC7A5		SERPINB4		GAS7	PLAUR	PRKD3	RPS6KA3	RALGAPA1	SCAMP4	LFNG	KRT8P12	SELENBP1	RNF144A	RHOBTB3	RAI2	SIX5	SYT8	SERPINA10	RASL12	SLC44A1	STARD4	SRGAP2C	TAF4B			SYT11	SERPINF1			SCG5	RUNX3	SERTAD2	SKIL	SHCBP1L
PGD		SCNN1A	RPS6KA2		ZNHIT2		PSEN1		RBCK1	SIGLEC15	SLCO4A1	SEC14L2	SLC28A2	SCHIP1	SLCO4A1		SHH		GCKR	PLIN2	PRPF6	S100A8	RANBP6	SCCPDH	LGALS7	LAG3	SERPINA3	RRAS2	RMC1	RFTN1	SLC18A1	TACSTD2	SERPINB2	RBP3	SLC6A20	STEAP1	STPG1	TAF5			SYT8	SETD6			SEC31B	RYR1	SH3TC2	SLC17A3	SLC28A3
PGRMC1		SEC14L2	S100A9				PTAFR		RIPK1	SLC17A1	SNHG17	SLC16A2	SLC29A2	SCN3A	SNHG17		SIDT1		GCLC	PNRC1	PRR15L	S100A9	RASGRP1	SDCBP	LGALS9	LAPTM5	SGCG	RSAD2	RMND1	S100A6	SLC22A12	TESC	SERPINB3	RGS2	SLIT3	STMN1	SYNE3	TDRD10			TAL2	SFN			SELENBP1	S100A2	SKP2	SLC26A2	SLC45A2
PINK1		SEMA3B	SCARB1				PTGER2		RIPK2	SLC25A31	SOCS1	SLC17A1	SLC49A3	SDCCAG8	SOCS1		SLC22A17		GCLM	PPARGC1A	PRR7	S100P	RBBP8	SEPTIN10	LRRC31	LDB3	SH3BGRL	S100A8	RNF43	S100P	SLC37A4	TFRC	SERPINE2	RSAD2	SMARCD3	TARS2	SYT1	TECTB			TANC1	SLC7A2			SELENOP	S100A3	SLC30A1	SLC7A6	SLN
PLG		SFN	SCNN1A				PTGER4		RNF213	SLC26A3	SOCS2	SLC17A4	SLC7A5	SEC14L2	SOCS2		SLC28A1		GCNT3	PPFIA4	PSPH	SAMD4A	RECQL	SERHL	LY6D	LGALS14	SHQ1	S100A9	RPRD1A	SAMD4A	SLC39A13	TJP3	SETD1A	RTP4	SNHG11	TCF19	TEP1	TFB2M			TBXA2R	SLN			SEMA3F	S100A4	SLC35A1	SLCO2A1	SLPI
PMM1		SH3BP5	SCUBE2				PTGIR		RNF31	SLN	SPAG11A	SLC17A5	SLCO1A2	SEMA6D	SPATA2L		SLC8A1		GGA2	PPP1R15A	PTBP2	SAT1	RHOBTB3	SERHL2	LYPD3	LILRA6	SHROOM2	S100P	RSBN1	SCAMP4	SLC39A4	TLCD4	SGCE	SCEL	STX1A	TESC	TGM2	TGFBRAP1			TFR2	SNN			SH3BGRL	SCML1	SLC5A3	SMAD6	SNED1
POR		SIAH2	SEMA3B				PTPRE		RSAD2	SLPI	SPINT1	SLC22A7	SLCO5A1	SESN1	SPHK1		SMAD5-AS1		GLA	PPP1R3C	RASGRP1	SCCPDH	RIF1	SERPINA1	MAGIX	LIMCH1	SIDT1	SAT1	S100A8	SCCPDH	SLC7A5	TMCC3	SH3BGRL	SELENOP	SULT1E1	TFRC	TGM5	TMEFF2			TGFBR1	ST8SIA3			SH3GL2	SCN5A	SMAD7	SMOX	SP140
PPARD		SLC16A1	SERPINA1				PVR		RTP4	SNAI2	SPOCK1	SLC25A31	SMPX	SLA	SPP1		SMIM2		GLP2R	PRDX5	RCN1	SDCBP	RMC1	SGPP1	MAML3	LINC01140	SLC16A1	SCARA3	SAMHD1	SDCBP	SLCO3A1	TMEM40	SLC14A1	SHC2	SULT2B1	TG	TLR2	TMEM132B			TGFBR3	STK36			SLC1A1	SERPINE1	SMN1	SMTN	SPANXC
PROS1		SLC19A2	SERPINA3				RAF1		SAMD9L	SNRPN	SPP1	SLC8B1	SPARCL1	SLC17A5	SPRY2		SNCB		GNE	PRKCA	RFWD3	SEC23A	RMI1	SH3GLB2	MAP2K6	LMO3	SLC19A2	SCCPDH	SATB2	SEPTIN10	SLIT3	TMPRSS4	SLC22A18AS	SIT1	SYF2	TIPIN	TNFAIP2	TMEM201			THBD	STRN4			SLC22A18	SH2D2A	SMPD2	SMURF1	SPRR2B
PSMB10		SLC1A1	SERPINA5				RASGRP1		SAMHD1	SOX15	SPRY2	SOX3	SPART	SLC24A1	STX11		SOX14		GOT1L1	PYGM	RHOBTB3	SEL1L3	RNF138	SLC12A2	MAPRE3	LPAR1	SLC1A1	SCG2	SEC24D	SGCE	SMARCD3	TNFRSF12A	SLC5A4	SLC16A7	SYN2	TMEM106A	TP53INP1	TMEM97			TLR6	STS			SLC24A1	SLC17A9	SNAPC4	SMURF2	SPRY4
PTGDS		SLC1A4	SFN				RELA		SECTM1	SPAG4	TET3	SP4	SPINT1	SLN	TAS2R16		SOX17		GPC1	RBPJ	RMC1	SEPTIN10	RPAP3	SLC2A10	MAST3	LPXN	SLC24A3	SDCBP	SGCG	SGPP1	SNHG6	TOM1L1	SPRR2C	SLC26A4	TBC1D17	TMEM40	TRIM56	TOP1MT			TNFRSF21	SYT3			SLC44A4	SLC26A4	SPRY1	SNAI1	SUSD4
PTGES		SLC22A5	SGK1				RGS1		SELP	SPATA1	TIMM50	SPTBN4	SPP1	SNAI2	TBC1D9		SPAG11A		GPCPD1	RORA	RNF43	SGMS1	RPRD1A	SLC6A6	MATN2	LRCH1	SLC39A8	SEPTIN10	SHTN1	SH3GLB2	SPCS3	TOR3A	ST8SIA3	SLC30A10	TCF3	TMEM53	TRPM4	TRMT1			TNFRSF8	SYT9			SLC6A20	SLC2A3	SPRY2	SOCS6	TBC1D29P
PTGES3		SLC24A3	SIAH2				RGS16		SERPING1	SYT1	TLCD3A	TAAR2	SPRY4	SNPH	TEX13A		SPN		GPNMB	RRAGD	RPP25	SGPP1	RRN3	SLC9A3R2	MCHR1	MAGEA11	SLC6A14	SEPTIN6	SLC16A6	SIX2	STAT5A	TPD52L3	SUGCT	SLC6A1	TGIF2	TMEM97	TTC7B	TRNAU1AP			TNNI3	TCF3			SMAD4	SLC35G2	SSX3	SPHK1	TBX3
PTGR1		SLC26A2	SLC16A1				RHOG		SLAMF7	TAAR2	TLR3	TAS2R1	SST	SPATA1	TLCD3A		SPOUT1		GPR135	S100A4	RUFY1	SLC12A2	RRP15	SLC9A6	MLANA	MAGEH1	SLC7A2	SERPINI1	SLC26A2	SLC12A2	SULT1E1	TPRN	SV2B	SLC9A2	TH	TMPRSS4	TUBA1A	TSFM			TRAPPC5	TCF7L2			SMPDL3A	SLC43A3	STK38L	SPSB1	TFPI2
PTS		SLC27A2	SLC1A4				RIPK2		SLC25A28	TANC2	TMEM158	TAS2R9	ST6GALNAC2	SSTR5	TLR3		SPRR1A		GPR174	SAP30	SATB2	SLC4A7	RTCA	SOX9	MTNR1A	MAP4K1	SMAD7	SGCE	SLC35A5	SLC2A10	SYPL2	TRAF4	SV2C	SORBS2	THBS3	TNFRSF12A	UTS2R	TSSC4			TSHB	TEF			SORL1	SLC5A3	SYBU	SSBP3	TM4SF20
PYCR1		SLC2A1	SLC22A5				RNF144B		SOCS1	TAS2R1	TMEM209	TESMIN	ST8SIA3	SULT1B1	TM4SF1		SPRR2B		GPR32	SCARB1	SGCB	SLC7A11	SLC26A2	SPAG4	MTSS2	MAPK10	SNAP23	SGPP1	SLC6A14	SLC2A6	TCAF2	UBE2C	TAS2R10	SPOCK1	TMEM186	TPH1	VAMP1	TTYH2			TSPAN5	TEN1			STAT4	SLC6A8	TBC1D22B	STC1	TMEM132A
RAP1GAP		SLC37A1	SLC24A3				ROS1		SOCS3	TAS2R9	TMPRSS6	TFAP2B	TAS2R16	SYT1	TM4SF5		SUV39H2		GPT2	SDC2	SGCG	SLC9A6	SLC6A14	SPTBN2	MUC5AC	MCF2	SOX3	SKAP2	SMAD7	SLC6A6	TCF21	UGT8	TBX1	SPOCK2	TNIP2	TRMT5	WDR47	TWNK			TUSC2	TFF3			SULT1C2	SLIT1	TBX19	TAGLN	TMEM92
RBP4		SLC39A6	SLC26A2				RTP4		SOD2	TBC1D2	TNFAIP8	TG	TBC1D19	TAGLN3	TMEM158		TAF7L		GPX2	SDC3	SGK3	SLCO2A1	SLC7A2	ST6GALNAC2	MX1	MGAT4A	SOX4	SLC2A6	SMPDL3A	SLC7A11	TCF3	UNC5B	TBX3	SPTA1	TNNC2	UBE2C	WNT5B	UBE3D			UBR1	TGFB1I1			TCEAL1	SPRR2B	TEK	TBC1D2B	TMPRSS6
REG1A		SLC7A2	SLC27A2				SCARF1		SP110	TCEAL4	TNFRSF12A	THEG	TEAD3	TANC2	TMPRSS6		TGM1		GRM5	SDC4	SH3GLB2	SMCO4	SMAD7	ST8SIA4	MX2	MKRN3	SOX9	SLC31A2	SNX10	SLC9A6	TEC	VAMP5	TENM1	SRA1	TNS2	UHRF1	WNT9A	UBIAD1			USP18	THRB			TEX14	STC2	TF	TBPL1	TNFRSF8
RETSAT		SLC7A5	SLC29A1				SCN1B		SPPL2A	TCN1	TNFRSF21	TIMP3	TEX13A	TCEAL4	TNFAIP8		TLX1		GRPR	SELENBP1	SIGMAR1	SNAPC1	SMARCA5	STIP1	MXD3	MLXIPL	SPIN1	SMAGP	SOX3	SORL1	TIMP3	VAT1	TGFA	SSBP2	TREM2	USP18	ZBED2	UNG			VEGFA	THYN1			TFF1	STRA6	TFAP2A	TBX3	TNFSF10
SAR1B		SLC9A3R1	SLC2A8				SELE		SRI	TG	TNFRSF4	TINAGL1	TF	TEK	TNFRSF12A		TNFRSF10C		GSR	SERPINE1	SLC1A1	SNX16	SMC3	TBC1D8	MXRA8	MMD	STC2	SOCS2	SP100	SPAG1	TNFRSF19	VILL	TLE6	TCF7L1	TSPAN4	VIP	ZNF236	USE1			VIM	TPK1			TLR3	SYNE3	THBD	TBXT	TRGV7
SERPINA6		SNX24	SLC7A5				SELENOS		SSPN	TGFB1I1	TNFRSF9	TLR5	TLR3	TG	TNFRSF1B		TNP2		GSTA2	SIAH2	SLC27A2	SOCS2	SS18	TCEA2	MYL9	MMP1	SYTL2	SPRR3	SP110	SPTBN2	TNNC2	WFDC12	TMEM262	TCHH	UBR3	ZNF518B	ZNF334	UTP14A			VPREB1	TSPO2			TM4SF1	TCEA2	TLR5	TFEB	TRPC3
SERPINE1		SOX3	SLC9A3R1				SELL		ST3GAL5	TGM3	TNFSF11	TNNI3	TLR6	TGM3	TNFRSF21		TPT1P8		GSTA5	SLC25A1	SLC27A3	SOWAHC	SSB	TENT5C	MYOM2	MMP10	TBC1D16	STS	STXBP3	SPTLC2	TNS2		TMPRSS6	TEC	UBXN2A		ZNF414	UTP15			VWA7	UBXN11			TMED3	TCHH	TM7SF3	THPO	TRPV6
SERTAD1		STC2	SNX10				SEMA4D		ST8SIA4	TMEM35A	TPST2	TNP1	TPBG	THAP10	TNFRSF4		TSPYL5		HAO1	SLC2A1	SLC39A8	SPAG1	STIL	THEM6	NAALADL1	MMP11	TBC1D30	SYNE2	SYCP2	ST3GAL4	TP53I13		TNR	TENT5C	UGGT1		ZNF467	VPS9D1				UGT8			TMEM135	TGM2	TMCC2	TLE3	TUBB2B
SHMT2		SULT2B1	SORD				SERPINE1		STAT1	TMPRSS11D	TRIB1	TREM1	TPST2	TMEM140	TNFRSF9		TUBA8		HDAC9	SLC2A3	SLC6A14	SPTLC2	STK17A	TNFRSF11B	NCR3	MMP17	TCF12	TBC1D2	TAF2	ST6GALNAC2	TPD52L1		TPPP3	TGFBR3	UNC119		ZNF789	VWA3B				UTF1			TMEM144	TH	TMEM131L	TMC7	UTF1
SLC12A4		SVIL	SOX3				SGMS2		STAT2	TNFAIP2	TRMU	TSPAN7	TRMT44	TMEM19	TNFSF11		TYMP		HECW1	SLC2A5	SMAD7	SQOR	TAF1D	TNFRSF21	NEU3	MMP9	TCN1	TBC1D2B	TAP1	STIP1	TSPAN4		TSPAN7	TLE1	UPB1			WDR4				UTS2R			TMEM14A	TM4SF5	TP53BP1	TMEM268	VEGFD
SLC1A5		SYBU	ST14				SLAMF1		STAT3	TNFRSF11A	TWNK	USP18	TRMU	TNFAIP2	TNFSF14		UTF1		HGD	SLC37A4	SNX7	SUSD6	TAF2	TNNT1	NINJ1	MOBP	TFAP2A	TBC1D8	TCF12	STRN4	TSPYL4		TWIST1	TMEM151B	VSIG2			WDR43				VAMP1			TMEM53	TMEM158	TRO	TNFAIP8	VN1R1
SLC22A1		SYNGR1	ST6GALNAC2				SLC11A2		STAT4	TNS3	URB2	USP27X	TSHR	TNNT3	TPBG		WFDC8		HIGD1B	SLC6A6	SOX3	TAF1A	TCN1	TPK1	NKX6-1	MSMB	TFF1	TCIM	TCN1	TBC1D8	TULP3		UGT2B17	TMLHE	WDTC1			WDR83				VAX2			TMPRSS3	TMEM47	TRPM4	TNS4	VNN2
SLC35B1		SYT12	STIL				SLC1A2		TAP1	TOM1	USP36	USP9Y	UGT8	TNS3	TRIB1		WNT1		HJURP	SRPX	SPTBN1	TAP1	TFPI2	TSPAN1	NOS1	MTMR8	TFF3	TEAD1	TDRD7	TGFB1I1	TYW1		UGT8	TNNT3	WFDC1			ZNF215				XCR1			TNFSF15	TMOD1	TUFT1	TRIB1	VPREB3
SLC35D1		TBC1D30	SULT2B1				SLC28A2		TAPBP	TRPM6	UTP3	VWA7	USP2	TRIB2	TRMU		WNT3		HLA-DOA	STBD1	STIL	TBC1D8	TIAM1	TTC9	NOX3	MYF6	TFPI	TES	TFPI	TGFBI	UPB1		ULBP1	TONSL	WIF1			ZNF420				ZFP92			TNNC1	TNFRSF1B	UGT8	TUBB4A	WIF1
SLC46A3		TFAP2C	TFAP2C				SLC31A1		TDRD7	TSC22D3	VDR	WNT4	VDR	TRPM1	TTTY1		XCL2		HLA-DOB	STC1	SYCP2	TCIM	TM4SF1	ULBP2	NPC1L1	NAP1L2	TGFB2	TFPI2	TFPI2	THEM6	VSIG2		VIM	TSPAN2	XDH			ZNF549				ZNF358			TNS3	TREML2	UPK2	TULP4	ZBTB16
SLC6A12		TFF1	TFF1				SLC31A2		TNFAIP2	TSPAN32	VPS50	ZKSCAN7	VSNL1	TSPAN7	TWNK		ZEB1		HLA-DQB1	STC2	TAF12	TFPI	TMED5	UPK1A	NR0B2	NAV3	TGIF2	TLE2	TM4SF1	TIMP2	WIF1		WNT16	TUBB2B	ZMYM5			ZNF593							TPM1	TRIM48	VAV3	UBL3	ZC3H12A
SLC6A6		TFF3	TFF3				SLC4A4		TNFAIP3	TXNIP	YRDC	ZNF155	XPNPEP2	TTC23	URB2		ZFHX4		HMOX1	SULT2B1	TBL1XR1	TGFB2	TOPBP1	UPK2	NR1I3	NME5	THADA	TMSB15B	TOP2B	TMPRSS4	ZC3H12C		XK	TUSC3	ZNF213			ZNF667							TRAF3IP2	TRPV2	WNT8B	UTP25	ZFP37
SMOX		TGIF2	TFPI2				SLC7A1		TNFAIP6	VWA7	ZBBX	ZNF286A	ZC3H12A	TXNIP	USH2A		ZNF236		HPDL	TES	TCAF1	TMEM121	TRMT61B	UPK3B	NRXN3	NMNAT2	TM4SF1	TNFAIP8	TRIM14	TNFAIP8	ZDHHC6		ZNF132	TXNIP	ZNF746			ZNRD2							TRPM4	TRPV6	ZFP64	WNT11	ZNF221
SPINT2		TGM2	TH				SLC7A2		TNFSF10	VWF	ZBTB32	ZNF324B	ZIC4	UNC93B1	USP36		ZNF821		HPN	TGFB3	TCN1	TMEM45A	TTC39A	UROS	NTF3	NOL4	TMEM268	TNFRSF21	TTC39A	TNFRSF11B	ZEB1		ZNF556	UCHL1											TSPAN1	TUBB2B	ZMYND8	WNT16	ZNF74
SSR3		THSD4	TIAM1				SPHK1		TOR1B	WNT4	ZBTB48	ZNF358	ZNF345	UTY	VDR		ZSCAN2		HRG	TGFBI	TENM1	TNFAIP8	TTK	VASP	NYNRIN	NPY6R	TMPRSS3	TNNT1	UBA3	TNFRSF21	ZFYVE21		ZNF667	VCAM1											TSPAN8	TULP2	ZNF184	WNT3	ZSCAN5A
TAT		TIAM1	TJP3				SRI		TRAFD1	ZBTB44	ZBTB7A	ZNF446	ZNF749	VILL	VSNL1				HRK	TGM2	TMEM106B	TNFRSF11B	TVP23B	VEGFB	OAS1	NRCAM	TRPS1	TSPAN12	UBE2L6	TNS3	ZNF213		ZRSR2P1	ZBTB10											USP18	VIM	ZNF292	WNT4
TDO2		TIPARP	TMPRSS3				STAB1		TRIM14	ZNF571	ZNF205	ZNF550	ZNF76	WSCD2	WDR62				HSPB3	TIPARP	TMEM187	TNFRSF21	UBA6	VIPR1	OLFML2A	NRP1	TSC22D3	TUBB2A	USP18	TP53I11	ZNF385A			ZNF22											VILL	WASF3	ZNF395	WNT7A
TGFB2		TJP3	TNNC1				TACR1		TRIM21		ZNF215	ZNF629		ZNF230	YRDC				HTATIP2	TKTL1	TMPRSS3	TNNT1	USP16	VTCN1	P2RX1	NTRK3	TSPAN3	UGT8	UTP14A	TRIM29	ZNF771			ZNF613											XK	WNT5A	ZNF512B	YIPF5
TKFC		TMEM164	TOB1				TACR3		TRIM25		ZNF276			ZNF362	ZBTB32				HVCN1	TMEM45A	TRIM24	TNS3	WDR43	VWA1	PCDHB1	OR2B6	TTC39A	UPK2	WIPF1	TTC9	ZSCAN26														ZNF711	WT1	ZNF652	ZCCHC14
TMBIM6		TMPRSS3	TOP2A				TAPBP		TRIM26		ZNF343			ZNF408	ZNF215				HYAL4	TNFAIP3	TSC22D3	TUBB2A	WIPF1	WIPI1	PCDHGB6	OR2C1	UGDH	UPP1	ZBTB10	TUBB2A																WWC2	ZNF696	ZFP36L1
TMEM176B		TOB1	TPBG				TIMP1		TXNIP		ZNF614			ZNF446	ZNF343				HYDIN	TPBG	TSPAN5	VAV3	XK	ZNF365	PCYT1B	PCDH8	VAV3	VGLL1	ZNF107	ULBP2																ZAP70	ZNF74	ZNF654
TMEM97		TPBG	TPD52L1				TLR1		UBE2L6					ZNF571					ICMT	TPD52	TTC39A	WIPI1	ZBTB10	ZNF467	PDE11A	PCDH9	WASF3	VTCN1	ZNF140	UPK1A																ZFPM2	ZPBP
TNFRSF1A		TPD52L1	TPSAB1				TLR2		UPP1					ZNF629					IDE	TPI1	WIPF1	WNT5A	ZBTB11		PDE6B	PCP4	ZBTB10	VTN	ZNF43	UPK2																ZNF134	ZXDC
TPST1		TSKU	TRIM29				TLR3		USP18					ZNF695					IDH1	TPST2	XK	ZNF281	ZCCHC2		PGLYRP1	PDE2A	ZHX2	XYLT1	ZNF652	UPK3B																ZNF22
TTPA		TTC39A	TSPAN13				TNFAIP6		VAMP5					ZSCAN16					IGFBP3	UGP2	ZNF107		ZNF107		PIK3C2B	PEG3	ZNF32	ZNF331	ZNF84	VASP																ZNF236
TYR		TUBB2B	TST				TNFRSF1B		VAMP8										IL10	VEGFA	ZNF273		ZNF267		PIP5K1C	PELI2				VWA1																ZNF350
UGDH		UGCG	UGDH				TNFRSF9		VCAM1										IL17A	VHL	ZNF43		ZNF43		PLAAT1	PFKFB1				WNT11
UPB1		UNC119	UNC13B				TNFSF10		WARS1										IL18R1	VLDLR	ZSCAN18		ZNF430		PLBD1	PIWIL1
UPP1		WFS1	WFS1				TNFSF15		XAF1										IL3RA	WSB1			ZNF84		PLEKHH3	PLA2G3
VNN1		WWC1	XBP1				TNFSF9		XCL1										IMPACT	XPNPEP1					PNMT	PLA2G4C
VTN		XBP1	XRCC3				TPBG		ZBP1										IQGAP2	ZFP36					PODNL1	PLAT
XDH		ZNF185	ZFP36				VIP		ZNFX1										ITGB8	ZNF292					PPFIA3	PLAU
																			JAKMIP3						PROC	PLEKHS1
																			JDP2						PRODH	PMS2P4
																			KCNE4						PROP1	PNMA2
																			KCNQ2						PRRG4	PPBP
																			KIAA0040						PRTN3	PRDM14
																			KIAA0232						PSORS1C1	PRG3
																			KIAA0319						PTPRCAP	PRL
																			KIF5C						PTPRH	PTGS2
																			KIT						PTPRU	PTX3
																			KPNA5						PYHIN1	RBP4
																			KRT8P41						RAMP3	RCAN2
																			KRTAP4-1						RASAL1	RDH5
																			L1CAM						RBIS	REEP2
																			L3HYPDH						RPL10P17	RELN
																			LANCL3						RRAD	RETN
																			LCN2						RTP4	RNASE1
																			LEF1						RUNDC3B	RRAGD
																			LEP						RYR2	RREB1
																			LILRA5						S100A7	RTN1
																			LINC01963						SCGB1A1	RUBCNL
																			LOXL3						SCGN	SATB1
																			LRP8						SCN10A	SCG3
																			LRPPRC						SCN7A	SCG5
																			LY86-AS1						SDS	SCN1B
																			MACC1						SERPINB13	SCN2A
																			MAFG						SERPING1	SEMA3A
																			MAP2						SIDT1	SH2D2A
																			MARS1						SIT1	SIGLEC15
																			MC2R						SLAMF1	SLC25A31
																			MCF2L-AS1						SLC22A11	SLC6A15
																			MCM10						SLC29A3	SLCO4A1
																			MCM3						SLC30A4	SLCO5A1
																			MDFIC						SLC3A1	SLIT1
																			ME1						SLC5A2	SMPX
																			MED29						SLC6A14	SNAP25
																			MELTF						SLC6A3	SNAP91
																			METAP2						SLC9A7	SORL1
																			METTL3						SMPDL3B	SOX9
																			MGST1						SOX11	SPINK1
																			MMP7						SPATA6	SPP1
																			MOG						SPRR1A	SPRY2
																			MPP3						SPRR1B	SRGN
																			MPPED2						SPRR3	ST18
																			MRAP2						SPTBN2	ST3GAL6
																			MRO						SYNPO	STC1
																			MTBP						TAGLN	STX1A
																			MTHFD2						TAS2R4	SYNE3
																			MTHFD2P1						TBC1D29P	SYT1
																			MUC5AC						TEX15	TAAR5
																			MYL2						TGFB2	TAGLN3
																			NAP1L1						TGM1	TAPT1
																			NAV2						THBD	TBX3
																			NCF2						THNSL2	TEC
																			NDUFC2						THRB	TERT
																			NEDD4						TM4SF4	TFDP3
																			NEIL3						TMEM8B	TFPI
																			NFE2L2						TNFRSF13B	TGM2
																			NFE4						TNFSF10	TLR4
																			NINJ2						TNNI3	TLR8
																			NKPD1						TREM2	TMEM156
																			NLN						TRH	TMEM158
																			NMRAL2P						TRIM48	TNFSF15
																			NQO1						TRPM2	TOX3
																			NQO2						TTLL1	TPH1
																			NR0B1						TUBAL3	TRIB2
																			NR1I2						UGT2A3	TRIM2
																			NRCAM						UGT2B17	TRIM36
																			NRG4						VAV3	TRIM45
																			NSD2						VGLL3	TSPY1
																			NT5DC1						VILL	UGT8
																			NUMBL						WHRN	USH1C
																			NUPR1						WNT16	VEGFC
																			NUTF2						XAF1	WNT7A
																			ODF3L1						YBX2	ZDHHC11
																			OFCC1						YOD1	ZEB1
																			OR10H3						ZBP1	ZNF528
																			OR56B1						ZBTB16	ZNF529
																			OR6K2						ZNF154	ZP4
																			OR8H1						ZNF750
																			ORC1
																			OSCAR
																			OSGIN1
																			OSTF1
																			P2RY6
																			PA2G4
																			PA2G4P4
																			PALLD
																			PANX2
																			PARL
																			PATJ
																			PCK2
																			PCSK6
																			PCSK9
																			PDE6B
																			PDZK1
																			PEG3
																			PFN2
																			PGD
																			PHGDH
																			PHLDB1
																			PIP
																			PIR
																			PLXND1
																			PNPLA4
																			POM121L12
																			POU3F3
																			PPAT
																			PPFIA2
																			PPIA
																			PPIAP22
																			PPIAP31
																			PPIF
																			PRG4
																			PRR36
																			PRR5
																			PRR5-ARHGAP8
																			PRSS38
																			PRSS53
																			PSAT1
																			PSAT1P1
																			PSAT1P3
																			PTDSS2
																			PTGR1
																			PTPMT1
																			PTPRD
																			PTPRZ1
																			RAB15
																			RAB42
																			RABL3
																			RANP6
																			RDM1
																			REEP1
																			REPS2
																			RESP18
																			RET
																			RFX4
																			RHBDL3
																			RHEX
																			RHOXF2
																			RIMKLA
																			RNF212
																			RPL22L1
																			RPLP2P1
																			RRM2
																			RTKN2
																			SCARA3
																			SCGB1D1
																			SCUBE1
																			SDS
																			SEMA3G
																			SERPINA12
																			SF1
																			SFN
																			SFTPA1
																			SHISA2
																			SHMT1
																			SIAE
																			SLC15A1
																			SLC1A4
																			SLC2A4
																			SLC2A9
																			SLC47A1
																			SLC48A1
																			SLC5A11
																			SLC6A6
																			SLC7A11
																			SLCO2B1
																			SLCO4C1
																			SLF2
																			SMAD9
																			SMC5
																			SMG6
																			SMIM22
																			SMPX
																			SNTG1
																			SOX2-OT
																			SPACA1
																			SPART
																			SPDYE3
																			SPN
																			SPP1
																			SPPL2B
																			SPTB
																			SQSTM1
																			SREBF1
																			SRGN
																			SRI
																			SRXN1
																			ST8SIA2
																			STAT4
																			STATH
																			STC2
																			STXBP5L
																			STYK1
																			SUB1
																			SULT1E1
																			SUV39H2
																			SYK
																			TALDO1
																			TDO2
																			TECRL
																			TERT
																			TET1
																			TEX19
																			TF
																			TFRC
																			TKT
																			TLR4
																			TM4SF20
																			TM9SF3
																			TMEM174
																			TMEM18
																			TMEM237
																			TMEM64
																			TNFRSF11B
																			TNFSF15
																			TNIP3
																			TP73
																			TPD52L1
																			TPPP3
																			TREX1
																			TRIM16L
																			TRIM29
																			TRIML2
																			TRPC2
																			TSKU
																			TSPAN7
																			TXNRD1
																			TXNRD3
																			TYR
																			TYRL
																			UBE2D1
																			UBE2D4
																			UBE2N
																			UBXN10
																			UCHL1
																			UGDH
																			UGT1A1
																			UGT1A10
																			UGT1A3
																			UGT1A4
																			UGT1A5
																			UGT1A6
																			UGT1A7
																			UGT1A8
																			UGT1A9
																			UNKL
																			USP6
																			VEGFD
																			VIL1
																			VPREB1
																			VSIG1
																			VTN
																			WDHD1
																			WDR87
																			WNT11
																			XYLB
																			ZC3H12D
																			ZIM2
																			ZNF135
																			ZNF143
																			ZNF326
																			ZNF367
																			ZNF429
																			ZNF430
																			ZNF486
																			ZNF649
																			ZNF714
																			ZSWIM6
[truncated: 24 more columns]
