# Supplementary material for: Analyses of Transcriptomics Cell Signalling for Pre-Screening Applications in the Integrated Approach for Testing and Assessment of Non-Genotoxic Carcinogens
Source: Int J Mol Sci. 2022 Oct 22;23(21):12718. doi: 10.3390/ijms232112718 (PMC9659232; doi:10.3390/ijms232112718)
Supplement: Supplementary file 1 [file ijms-23-12718-s001.zip › Table S2rev.xlsx]

## Sheet: Legend
yes
in principle possible for the cell category, but not published for the specific cell type indicated here
no
to be investigated
no information	x

## Sheet: cells
Table S2: Criteria for the cell line selection
category of cells	Cells	https://www.ebi.ac.uk/ols/ontologies/clo	https://web.expasy.org/cellosaurus/	exemplary references for use in -omics testing for carcinogenicity	human variability (cells for orthogonal assays over different genetic background)	human tissue or organ specific (differentiated cells for orthogonal assays over different tissues/organs, healthy, young/old, diseased)	human	replicating	potential for phenotypic anchoring of transcriptomics readouts	immortal	non-tumorigenic	healthy	aged or specific disease status	normal chromosome number	p53 competent	protocols available for use in high throuput methods	protocols available for use in complex 3D models	animal products free culture established		full identity documentation	well characterized and stable karyo/phenotype (sourced from standard cell-banks)	well characterized growth curves and functional characteristics	contamination free	biotransformation capacity	potential to combine with biotransforming cells or reagents	intellectural property and permission for use
																				available documentation for obligatory basic standard cell culture requirements according GIVIMP OECD GD 286 and suggestions from Pamies et al. 2020
hiPSC derived cells	BJ-1 e.g. differentiated to hepatocytes	Subclass of: human stem cell line cell induced pluripotent stem cell line cell derived from organism some Homo sapiens		Braak et al. 2021; https://doi.org/10.1016/j.tiv.2021.105107
human mesenchymal stem cells	MSCs			Pan et al. 2022; https://doi.org/10.1016/j.envpol.2021.118483
human primary cells	HUVEC: primary Human Umbilical Vene Endothelial cells	x	x	angiogenesis inhibition, not induction: Huttala et al. 2015; http://dx.doi.org/10.14573/altex.1411271
hTERT immortalized cells	RPTEC/TERT 1	x	Renal Proximal Tubule Epithelial Cells/TERT-immortalized 1 human, male, adult https://www.evercyte.com/rptec-tert-1.html	Limonciel et al. 2018; https://doi.org/10.3389/fgene.2018.00558
	HUVEC/TERT2	x	hTERT immortalized human umbilical vein endothelial cell line human, female https://www.evercyte.com/huvec-tert2-209.html	Racz et al. 2021; https://doi.org/10.1038/s41598-021-98869
human spontaneusly immortalized	TK6	Subclass of: immortal cell line cell is_specified_input_of some suspension cell line culturing	human, male, 5Y, transformed cell line Disease: Hereditary spherocytosis	Li et al. 2017; 10.1073/pnas.1714109114 Chapman et al. 2020 https://doi.org/10.1007/s00204-020-02902-3
rodent ESC	J1	x	male blastocyst stage	Yin et al. 2019; https://doi.org/10.1016/j.ecoenv.2019.03.115
	C57/Bl6 B4418 wild-type mES transgenic reporter celllines	Subclass of: embryonic stem cell line cell derived from organism some Mus musculus transfected with GFP reporter gene regulated by regulatory regions for biomarkers for DNA damage (Bscl2, Rtkn), oxidative stress (Srxn1, Blvrb), protein damage (Ddit3), p53 activation (Btg2)		Hendriks et al. 2012; doi:10.1093/toxsci/kfr281; Allemang et al. 2020; DOI: 10.1002/em.22418
	D3	Subclass of: embryonic stem cell line cell derived from organism some Mus musculus	male blastocyst stage	Riswijk et al. 2014; doi:10.1093/mutage/get055
rodent primary cells	SHE: primary Syrian Hamster Embryo Cells	x	x	Landkocz et al. 2011; https://doi.org/10.1186/1471-2164-12-524; Pickles et al. 2016; https://dx.doi.org/10.1016%2Fj.mrgentox.2016.04.002														?
	mouse hepatocytes	x	x	Mathijs et al. 2009, https://doi.org/10.1093/toxsci/kfp229
rodent spontaneously immortalized	BALBc3T3	Sublcass of: immortal mouse embryo-derived cell line cell mouse immortal cell line cell is_specified_input_of some adherent cell line culturing derives from some (cell type and part of some (embryo and part of some Mus musculus))	x	Mascolo et al. 2018; DOI: 10.1093/carcin/bgy037; Bhas CTA still to be published
	V79	Subclass of: immortal Chinese hamster cell line cell derives from some ( cell type and part of some Cricetulus griseus and existence starts during some embryo stage)	male, adult, spontanously immortalized, derived from lung	Li et al. 2017; https://doi.org/10.1007/s00204-016-1904-7; Shi et al. 2017; http://dx.doi.org/10.3967/bes2017.031										?				?
	WB-F344	x	rat (Fisher344) male, adult, spontanously immortalized [liver stem cell like (oval cell), DOI: 10.1016/s0168-8278(02)00013-2]	Yang et al. 2014; doi:10.4149/neo_2014_025														?
