# Supplementary material for: Analyses of Transcriptomics Cell Signalling for Pre-Screening Applications in the Integrated Approach for Testing and Assessment of Non-Genotoxic Carcinogens
Source: Int J Mol Sci. 2022 Oct 22;23(21):12718. doi: 10.3390/ijms232112718 (PMC9659232; doi:10.3390/ijms232112718)
Supplement: Supplementary file 1 [file ijms-23-12718-s001.zip › Table S3 rev.xlsx]

## Sheet: Supplementary table SXX
Table S3: 60 genes differentially expressed in the breast cancer for selecting interacting chemicals
BCL2
AR
ABCB1
KRT5
EGFR
CAV1
ESR1
PGR
ID4
BTG2
ADRB2
XBP1
MYB
GATA3
ERBB4
FOXA1
FABP4
KRT17
GFRA1
TFF3
DACH1
FABP7
ZBTB16
COL4A3BP
HMGB3
HDGF
TRIM29
EN1
HMGA1
YBX1
ABCC8
IL12RB2
GRB7
PKMYT1
ESPL1
ERBB2
DNMT1
MYBL2
CKS1B
CDC25C
EZH2
CDKN3
PTTG1
DLGAP5
CENPA
MELK
NEK2
TTK
BUB1
MCM6
BUB1B
TK1
MCM3
MCM2
CCNB2
AURKB
RAD51
AURKA
BIRC5
CDK1
