# Supplementary material for: Analyses of Transcriptomics Cell Signalling for Pre-Screening Applications in the Integrated Approach for Testing and Assessment of Non-Genotoxic Carcinogens
Source: Int J Mol Sci. 2022 Oct 22;23(21):12718. doi: 10.3390/ijms232112718 (PMC9659232; doi:10.3390/ijms232112718)
Supplement: Supplementary file 1 [file ijms-23-12718-s001.zip › Table S4 rev.xlsx]

## Sheet: Sheet1
Table S4: 141 regulons for breast cancers identified by VIPER
regulon	size	normalised enrichment score	p value	false discovery rate
E2F2	112	5	6e-07	0.000843
PLK1	278	4.96	7e-07	0.000843
RAD51	153	4.88	1.1e-06	0.000883
MYBL2	250	4.68	2.9e-06	0.00113
AURKA	297	4.68	2.9e-06	0.00113
SEC14L2	220	-4.65	3.2e-06	0.00113
MEIS3P1	807	-4.71	2.5e-06	0.00113
CKS1B	153	4.6	4.3e-06	0.00125
FOXM1	385	4.58	4.7e-06	0.00125
TCF19	168	4.56	5.1e-06	0.00125
TRIP13	121	4.41	1.02e-05	0.00215
MELK	296	4.41	1.06e-05	0.00215
RCOR2	224	4.37	1.26e-05	0.00237
DLGAP5	181	4.3	1.67e-05	0.00279
PGR	433	-4.3	1.71e-05	0.00279
PBK	56	4.17	3e-05	0.00445
BUB1	404	4.17	3.1e-05	0.00445
CIT	110	4.13	3.67e-05	0.00472
TCEAL1	318	-4.14	3.48e-05	0.00472
ESR1	879	-4.11	4.03e-05	0.00493
BUB1B	273	4.07	4.68e-05	0.00544
ESPL1	164	4.06	4.97e-05	0.00552
HMGA1	401	3.99	6.51e-05	0.00676
ILF2	414	3.99	6.64e-05	0.00676
ZBTB16	255	-3.92	8.68e-05	0.00849
NEK10	363	-3.9	9.6e-05	0.00902
CCNE1	486	3.89	0.0001	0.00907
BTG2	317	-3.87	0.000109	0.00954
E2F8	108	3.85	0.000119	0.00991
TTK	395	3.84	0.000122	0.00991
MASTL	105	3.78	0.000157	0.0117
PTTG1	275	3.77	0.000162	0.0117
LTBP4	295	-3.77	0.000161	0.0117
ANKRD30A	141	-3.79	0.000152	0.0117
HDGF	185	3.74	0.000183	0.012
CDKN3	125	3.73	0.000189	0.012
AURKB	436	3.73	0.000191	0.012
NFKBIL2	105	3.73	0.000192	0.012
AR	691	-3.75	0.000176	0.012
CDC25B	85	3.7	0.000214	0.0125
CDK1	147	3.7	0.000215	0.0125
ACVR1C	450	-3.7	0.000212	0.0125
NT5C2	132	3.67	0.00024	0.0135
GSG2	68	3.67	0.000245	0.0135
MCM2	143	3.66	0.000255	0.0135
MCM6	130	3.65	0.000259	0.0135
ERBB4	345	-3.66	0.000255	0.0135
TAF11	247	3.62	0.00029	0.0143
HMGB3	179	3.62	0.000298	0.0143
NEK2	150	3.61	0.000305	0.0143
PTPRT	375	-3.61	0.000305	0.0143
WWP1	639	-3.62	0.000291	0.0143
E2F1	225	3.59	0.000334	0.0151
CKMT2	213	-3.59	0.000333	0.0151
PFKFB1	172	-3.58	0.000344	0.0153
CDC25C	120	3.55	0.000385	0.0168
PKDCC	232	-3.52	0.000428	0.0183
CCNB1	119	3.51	0.000443	0.0184
AFF3	659	-3.51	0.000444	0.0184
PDK4	279	-3.48	0.000503	0.0205
NTRK2	282	-3.47	0.000515	0.0206
CDC25A	223	3.47	0.000529	0.0209
GLI1	383	-3.46	0.000546	0.0209
MAP3K12	407	-3.46	0.000542	0.0209
DMRTA1	122	-3.45	0.000565	0.0213
YBX1	878	3.42	0.00063	0.0217
CALCOCO1	320	-3.41	0.000641	0.0217
PPARG	279	-3.42	0.000629	0.0217
STK32B	316	-3.42	0.00062	0.0217
CREBL2	252	-3.43	0.000613	0.0217
CDK17	443	-3.43	0.000613	0.0217
SNRK	126	-3.43	0.000596	0.0217
PLK4	157	3.41	0.000651	0.0218
MEOX2	243	-3.4	0.00067	0.0221
APBB2	291	-3.39	0.000695	0.0224
TSHZ2	409	-3.39	0.000695	0.0224
HLF	149	-3.38	0.000719	0.0228
EZH2	134	3.38	0.000735	0.023
SUV39H2	392	3.36	0.000782	0.023
MAST4	404	-3.36	0.000782	0.023
TESK2	88	-3.36	0.000767	0.023
ANKRA2	614	-3.37	0.000759	0.023
EBF3	226	-3.37	0.000751	0.023
FHL5	114	-3.35	0.000807	0.0235
MCM7	155	3.33	0.000871	0.0246
PKMYT1	272	3.33	0.000876	0.0246
CBX7	298	-3.33	0.000869	0.0246
ZNF396	485	-3.31	0.000933	0.0259
NR3C2	111	-3.29	0.001	0.0272
PHF15	386	-3.29	0.000992	0.0272
TP53	171	3.28	0.00104	0.0279
SGK2	256	-3.28	0.00106	0.028
PFKP	309	3.25	0.00114	0.0299
WNK4	249	-3.23	0.00123	0.0317
PTPRN2	198	-3.23	0.00123	0.0317
PHF19	127	3.22	0.0013	0.032
FOXP1	286	-3.21	0.00132	0.032
ULK4	302	-3.21	0.00131	0.032
MAP3K1	227	-3.22	0.00129	0.032
ATF7	226	-3.22	0.00129	0.032
XBP1	443	-3.22	0.00129	0.032
PTPRB	346	-3.21	0.00134	0.0322
KCNH1	222	-3.19	0.00142	0.0336
MCM4	87	3.19	0.00143	0.0337
UCK2	398	3.18	0.00148	0.0345
PER2	183	-3.18	0.0015	0.0345
MCM3	110	3.17	0.00153	0.035
DUSP9	186	3.15	0.00161	0.0364
RELN	210	-3.14	0.00166	0.0373
BMX	230	-3.13	0.00174	0.0377
DACH1	301	-3.13	0.00173	0.0377
NR3C1	162	-3.13	0.00172	0.0377
NPR1	353	-3.14	0.00171	0.0377
MAML3	210	-3.12	0.00184	0.0391
PEG3	170	-3.12	0.00183	0.0391
PPM1G	504	3.11	0.00187	0.0394
DAZAP2	262	-3.11	0.00189	0.0394
EZH1	482	-3.09	0.00201	0.0416
COL4A3BP	466	-3.08	0.00207	0.0419
MAGI2	105	-3.08	0.00207	0.0419
ZNF442	141	-3.08	0.00207	0.0419
DLG2	59	-3.07	0.00211	0.0422
MMD	134	-3.07	0.00214	0.0426
MCM8	106	3.06	0.00218	0.043
ZNF695	216	3.06	0.00223	0.0435
DNMT3A	141	3.06	0.00225	0.0436
HES6	111	3.05	0.00229	0.0441
NR2F1	170	-3.04	0.00236	0.045
TEAD4	115	3.04	0.0024	0.0453
SRC	154	3.03	0.00241	0.0453
SEPHS1	314	3.03	0.00244	0.0454
DNMT1	95	3.02	0.00249	0.0454
CDC7	184	3.02	0.00253	0.0454
MEIS2	138	-3.02	0.00256	0.0454
ZNF208	150	-3.02	0.00256	0.0454
PER1	131	-3.02	0.00254	0.0454
GLI3	316	-3.02	0.00253	0.0454
KLF4	135	-3.02	0.00252	0.0454
TK1	249	3	0.00269	0.0473
SKP2	166	2.99	0.00277	0.0481
LMX1B	369	-2.99	0.00275	0.0481
